# 1 Long-term *in vivo* imaging of mouse spinal cord 2 through an optically cleared intervertebral window

3 Wanjie Wu<sup>1,7</sup>, Sicong He<sup>2,7</sup>, Junqiang Wu<sup>3</sup>, Congping Chen<sup>1</sup>, Xuesong Li<sup>1</sup>,

4 Kai Liu<sup>3,4,5</sup>, Jianan Y. Qu<sup>1,4,5,6,\*</sup>

5 <sup>1</sup>*Department of Electronic and Computer Engineering, The Hong Kong University of Science and Technology,*  
6 *Clear Water Bay, Kowloon, Hong Kong, P. R. China*

7 <sup>2</sup>*Department of Biology, School of Life Sciences, Southern University of Science and Technology, Shenzhen, China*

8 <sup>3</sup>*Division of Life Science, The Hong Kong University of Science and Technology, Clear Water Bay, Kowloon, Hong*  
9 *Kong, P. R. China*

10 <sup>4</sup>*State Key Laboratory of Molecular Neuroscience, The Hong Kong University of Science and Technology, Clear*  
11 *Water Bay, Kowloon, Hong Kong, P. R. China*

12 <sup>5</sup>*Center of Systems Biology and Human Health, The Hong Kong University of Science and Technology, Clear Water*  
13 *Bay, Kowloon, Hong Kong, P. R. China*

14 <sup>6</sup>*Molecular Neuroscience Center, The Hong Kong University of Science and Technology, Clear Water Bay,*  
15 *Kowloon, Hong Kong, P.R. China*

16 <sup>7</sup>*These authors contributed equally to this work.*

17 *\*Corresponding authors: [eequ@ust.hk](mailto:eequ@ust.hk) (J.Y.Q.)*

## 18 19 20 **ABSTRACT**

21 Spinal cord, as part of the central nervous system, accounts for the main communication pathway  
22 between the brain and the peripheral nervous system. Spinal cord injury is a devastating and largely  
23 irreversible neurological trauma, and can result in lifelong disability and paralysis with no  
24 available cure. *In vivo* spinal cord imaging in mouse models without introducing immunological

25 artifacts is critical to understand spinal cord pathology and discover effective treatments. We  
26 developed a minimal-invasive intervertebral window by retaining ligamentum flavum to protect  
27 the underlying spinal cord. By introducing an optical clearing method, we achieved repeated two-  
28 photon fluorescence and stimulated Raman scattering imaging at subcellular resolution with up to  
29 16 imaging sessions over 167 days and observed no inflammatory response. Using this optically  
30 cleared intervertebral window, we studied the neuron-glia dynamics following laser axotomy and  
31 observed strengthened contact of microglia with the nodes of Ranvier during axonal degeneration.  
32 By enabling long-term, repetitive, stable, high-resolution and inflammation-free imaging of mouse  
33 spinal cord, our method provides a reliable platform in the research aiming at understanding and  
34 treatment of spinal cord pathology.

35

36

## 37 **1. INTRODUCTION**

38 *In vivo* imaging of the central nervous system (CNS) of small animal models is a crucial means of  
39 understanding the function of the CNS and its response to injury or diseases. In recent decades,  
40 nonlinear optical (NLO) microscopy has emerged as a powerful tool for the high-resolution  
41 imaging of biological tissues, including the CNS. Imaging of the live brain with sub-cellular  
42 resolution has been achieved using NLO microscopy through a cranial window in the mouse skull<sup>1</sup>.  
43 However, this open-skull procedure induces inflammation, indicated by microglia and astrocyte  
44 activation<sup>2</sup>, which can alter neuronal physiology<sup>2</sup> and pia blood vessels<sup>3</sup>. To avoid the  
45 inflammation caused by surgery, thinned-skull protocols<sup>4,5</sup> were developed, which provides a  
46 minimally invasive way to study cell dynamics in both healthy<sup>6,7</sup> and pathological conditions<sup>8,9</sup> in  
47 the living brain. As with the brain, imaging the spinal cord without inflammation induced by

48 surgical preparation has been in high demand for spinal cord studies, including spinal cord injury ,  
49 multiple sclerosis, neuropathic pain and spinal cord ischemia. However, preparing a spinal window  
50 in a mouse is much more challenging than a cranial window because of the more complex gross  
51 anatomy and large motion artifacts caused by the heartbeat and breathing.

52 To acquire high-quality optical images of the spinal cord, acute surgical preparation is  
53 usually adopted with a limited time window of several hours<sup>10,11</sup>. During preparation, the spinal  
54 cord is exposed by performing a dorsal laminectomy. Sometimes, dura is removed to increase  
55 imaging depth and artificial ventilation is used to minimize motion artifacts caused by  
56 breathing<sup>12,13</sup>. However, this procedure inevitably disturbs the spinal cord tissue and usually causes  
57 mild trauma. Furthermore, longitudinal imaging requires repetitive surgery and permits only up to  
58 six imaging sessions because of the increasing difficulty of repetitive surgery<sup>10,13–15</sup>. Another  
59 method of implanting a spinal chamber can achieve long-term imaging without the requirement of  
60 repetitive surgery<sup>16–18</sup>. However, a transient increase in the density of microglia and other  
61 inflammatory cells was observed after window implantation, because an immune response was  
62 activated in the spinal cord<sup>16,17</sup>. To increase window clarity and tolerance to implants,  
63 pharmacologic management of inflammation is required, which may affect the disease process  
64 being investigated. Recently, another protocol, spinal cord imaging through the intervertebral  
65 spaces without performing a dorsal laminectomy, has been proposed as a less invasive way to  
66 provide optical access to the spinal cord<sup>19,20</sup>. By removing muscle and ligament tissues between  
67 adjacent vertebrae, the spinal cord was imaged with only dura left. Using this protocol, it is  
68 reported that microglia activation was not observed by 2-hour time-lapse imaging after surgery,  
69 though clear microglia imaging and quantitative analysis were not demonstrated in the study<sup>19</sup>.  
70 Repetitive surgery coupled with an intervertebral window enabled longitudinal imaging with up

71 to ten separate imaging sessions over more than 200 days<sup>20</sup>, which is comparable to the  
72 performance of a chronic implanted window<sup>16</sup>.

73 Despite the less invasive protocol of the intervertebral window, the inflammatory response  
74 to this surgical preparation has not been studied well, and it remains unclear whether an  
75 intervertebral window can serve as a reliable method to study neuroinflammatory disorders in the  
76 spinal cord without surgery-induced artifacts. In this work, we propose an improved intervertebral  
77 window protocol which retains the ligamentum flavum to significantly decrease the risk of  
78 activating microglia. In addition, to overcome the scattering issue induced by the ligamentum  
79 flavum and improve the image quality of the spinal cord, we adopted an optical clearing technique  
80 using a nontoxic chemical, Iodixanol, to treat the window interface. Using this method, we  
81 achieved subcellular-resolution, longitudinal imaging of the spinal cord with 16 imaging sessions  
82 over 167 days without an inflammatory response. With this minimally invasive long-term  
83 intervertebral window, we used a multimodal NLO microscope system (**Supplementary Fig. 1**)  
84 to study the neuron-glia dynamics following imaging-guided laser injury of axons. We further  
85 investigated the interaction between microglia and the nodes of Ranvier under normal and injured  
86 conditions. Different types of dynamic glia-node interaction were classified based on time-lapse  
87 imaging, and significantly strengthened contact between microglia and the nodes of Ranvier was  
88 observed after the distal axon was injured by laser ablation.

89

90

## 91 **2. RESULTS**

### 92 **2.1 Intervertebral window for *in vivo* imaging of spinal cord**

93 We investigated the behavior of microglia in the spinal cord of Cx3CR1-GFP mice  
94 following preparations of a conventional intervertebral window and a new intervertebral window  
95 of retaining ligamentum flavum, respectively. The microglial morphology was used as an indicator  
96 of inflammatory activity. It is known that microglial cells are the primary immune effector cells in  
97 the CNS. In the homeostatic state, microglia are highly ramified and dynamic, with their motile  
98 processes continually probing the tissue's microenvironment<sup>21-23</sup>. On exposure to pathogen- or  
99 damage-associated molecular patterns, microglia are activated and change their morphology from  
100 ramified to amoeboid with enlarged soma and retracted processes<sup>24-27</sup>. As microglial phenotypes  
101 are inextricably associated with their function<sup>28-31</sup>, microglial morphology has been used widely  
102 as an objective criterion by which microglia activation and inflammatory activity in the CNS can  
103 be identified<sup>30,32-40</sup>. Notably, a number of studies have used a set of morphological parameters to  
104 describe the shapes of microglia cells and analyzed their dependence on the level of activation,  
105 which was assessed using immunohistochemical staining of cytokine signatures to highlight  
106 inflammatory activation<sup>30,33,41-43</sup>. Quantitative analysis showed that the morphology of microglia  
107 changes progressively with the level of expression of various inflammatory cytokines including  
108 IL-1 $\beta$ , IBA-1, CD11b, and CD68<sup>30,33,41,43</sup>. Unlike the immunostaining method that is only  
109 applicable to postmortem study, the morphological analysis of microglia combined with high-  
110 resolution *in vivo* imaging techniques can serve as a versatile and sensitive means to detect subtle  
111 inflammatory activity in living animals, which is indispensable for *in vivo* longitudinal study of  
112 immune responses to different pathological situations. Among the morphological parameters, the  
113 ramification index (RI)<sup>32,44-47</sup> and the number of process endpoints (NPE)<sup>33,36,48-50</sup> are widely used  
114 to describe the ramification of microglial cells quantitatively. RI is calculated as the ratio of the  
115 cell's perimeter to its area normalized to that of a circle with the same area<sup>32</sup>, while NPE counts

116 the total number of microglial cell processes<sup>33</sup>. Significant decreases in both the ramification index  
117 and the endpoints of microglia are typical symptoms of high degrees of inflammatory activation,  
118 which is evident in different pathological models of neuroinflammation such as diffuse brain injury,  
119 ischemic stroke, peripheral nerve injury, etc<sup>33,44,47,50</sup>.

120 To study the microglial phenotypes under different conditions, mice were divided into three  
121 groups (three mice per group) (**Supplementary Fig. 2**). The first group of mice had dorsal column  
122 crush (DCC) injury performed at the T12 level after a laminectomy to generate an acute  
123 inflammatory process, so that the morphology of activated microglia can be characterized first as  
124 a positive control. The second group of mice underwent the conventional surgical procedure of  
125 intervertebral window preparation to expose the spinal cord in the intervertebral gap. One hour  
126 after surgery, mice in these two groups were imaged by a two-photon excited fluorescence (TPEF)  
127 microscope for two hours and the behavior of microglia was recorded over a 30-min interval. After  
128 imaging, all the mice were perfused for histological analysis. In addition, the third group of mice,  
129 which did not undergo any surgery before the histological study, were used as a negative control.  
130 Next, we examined the microglia morphology in fixed spinal cord slices of the three groups of  
131 mice (**Supplementary Fig. 3a**). The microglial cells in the region of 0–50  $\mu\text{m}$  below the dorsal  
132 surface were selected for analysis, corresponding to the *in vivo* imaging depth. By comparison  
133 with the negative control group, the small values of RI and NPE in the positive control group  
134 indicates severe activation of microglia after spinal cord injury (**Supplementary Fig. 3b,c**). Of the  
135 three mice with intervertebral windows, one mouse (#2) showed significantly decreased RI and  
136 NPE and aggregation of microglia was also found close to the dorsal surface (**Supplementary Fig.**  
137 **3a**), while the other two mice showed comparable morphological indices to the negative control  
138 group. Then we compared the *in vivo* results (**Supplementary Fig. 3d-f**) with those of

139 histopathology studies. The *in vivo* time-lapse imaging shows that microglia in the spinal cord  
140 injured by DCC were activated with significantly decreased ramification at the beginning of  
141 imaging and little change over the following two hours (**Supplementary Fig. 3e,f**). This suggests  
142 that microglia can respond quickly to pathological insults and be activated within an hour. In the  
143 mice with an intervertebral window, microglia showed differentiated but stable ramification during  
144 the two-hour observation. Consistently with histological results, the mouse (#2) with activated  
145 microglia in histological analysis also showed activation of microglia with retraction of fine  
146 processes in *in vivo* studies (**Supplementary Fig. 3e,f**). To evaluate rigorously the possibility of  
147 the activation of microglia during longitudinal imaging following surgical preparation of an  
148 intervertebral window, we repeatedly imaged 12 mice with 2-6 day intervals between the adjacent  
149 imaging sessions. The results show that activation of microglia was found in 58% (7/12) of the  
150 mice in the first imaging session, and 75% (3/4) of the mice in the second imaging session  
151 (**Supplementary Fig. 3h**). None of the mice underwent surgery three times without activation of  
152 microglia (**Supplementary Fig. 3h-k**). Notably, the difficulty of surgery increased significantly  
153 in later procedures because of the growth of scar tissue adhering to the surface of the spinal cord.  
154 This result suggests that intervertebral window preparation will inevitably cause irritation to the  
155 spinal cord and induce activation of microglia, preventing the inflammation-free longitudinal study  
156 of the spinal cord.

157         Prompted by the thinned-skull procedure, we explored whether we can lower the risk of  
158 inflammation by retaining the ligamentum flavum during surgical preparation of the intervertebral  
159 window (**Supplementary Fig. 4**). The ligamentum flavum (LF) is a series of ligaments composed  
160 of elastic fibers and collagen. They join the laminae of the adjacent vertebra and are located  
161 directly above the spinal cord from a posterosuperior view, separated by the meninges and epidural

162 space (**Fig. 1a,b**)<sup>51,52</sup>. The epidural space contains adipose tissue and blood vessels, which,  
163 together with ligamentum flavum, protects the underlying spinal cord, but makes the whole  
164 window optically inhomogeneous and less transparent (**Fig. 1c-e**). A small number of cells labeled  
165 by Texas Red Dextran above the spinal cord are probably phagocytic immune cells, which is also  
166 observed in previous studies<sup>16,17,53</sup> (**Fig. 1e**). Nevertheless, we found that high-resolution images  
167 of the spinal cord can still be captured in a small field of view (FOV) without there being adipose  
168 tissue and blood vessels along the optical path (**Supplementary Fig. 5**).

169 To evaluate the activation of microglia beneath the new intervertebral LF window, we  
170 characterized the morphology of microglia both *in vivo* and in fixed spinal cord using high-  
171 resolution TPEF imaging, and compared it to that of intact and injured spinal cords. Histological  
172 results show that microglia under the window showed ramified morphology with similar RI and  
173 NPE to the negative control group (**Fig.1f-h**). Meanwhile, *in vivo* time-lapse imaging suggests that  
174 microglia retained ramified morphology during the two-hour imaging period (**Fig. 1i-k**). To  
175 validate the repeatability of the surgical preparation of the new window, we imaged another ten  
176 mice through the LF window and conducted quantitative morphological analysis of microglia.  
177 Notably, we found none of the mice showed activation of microglia (**Fig. 1m,n**). This result  
178 indicates that retaining LF can indeed prevent microglia activation, and thus this protocol of LF  
179 window can serve as a minimally invasive method for *in vivo* optical imaging of the spinal cord.



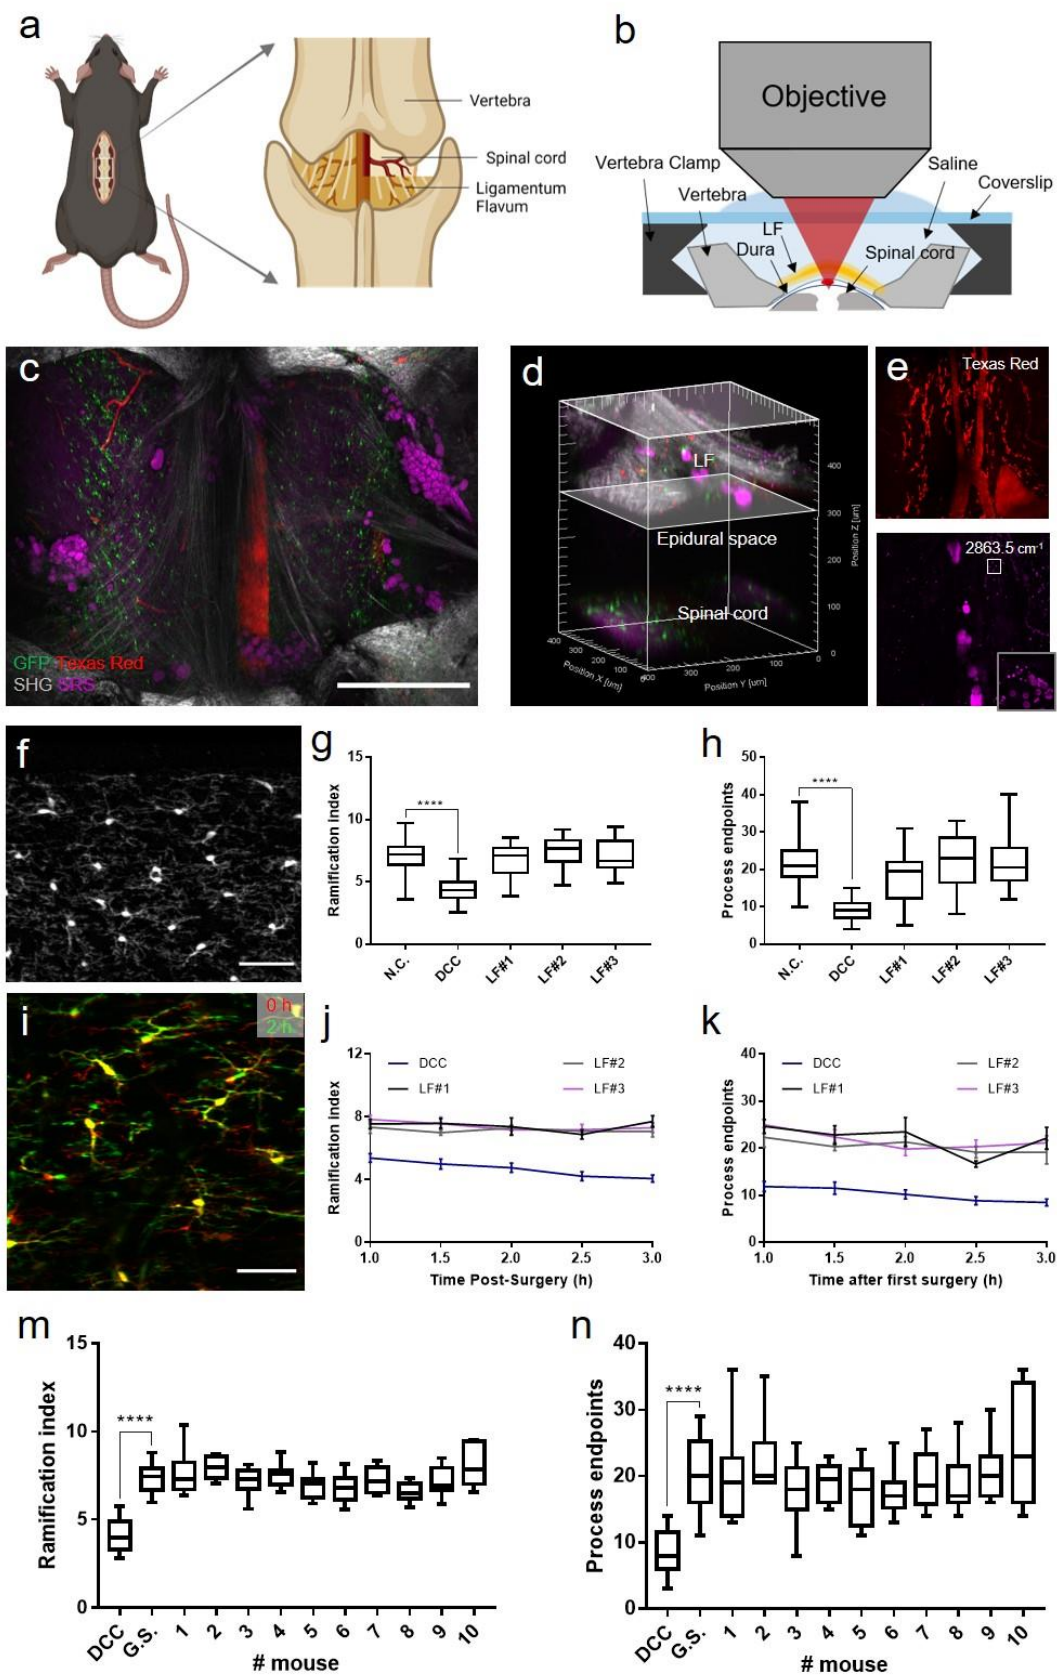

181 **Figure 1. Intervertebral window of retaining ligamentum flavum.** (a) Schematic diagram of the  
182 intervertebral window with ligamentum flavum (LF). (b) Cross-sectional schematics of the LF window. (c,  
183 d) Projection and 3D reconstruction of a multimodal image stack through the LF window to spinal cord  
184 surface in a live Cx3CR1 transgenic mouse. Green: GFP labeled microglia; Red: blood vessels labeled with  
185 Texas Red dextran; Gray: second harmonic generation (SHG) signals of collagen and other connective  
186 tissues; Magenta: stimulated Raman scattering (SRS) signals of adipose tissue and myelin with the Raman  
187 shift at  $2863.5\text{ cm}^{-1}$ , attributed to the vibration of the methylene group enriched in lipids. Scale bar,  $500\ \mu\text{m}$ .  
188 (e) Maximal projection of the image volume between the two planes of depth from  $300\text{-}500\ \mu\text{m}$  indicated  
189 in (d) showing the distribution of blood vessels (Texas Red dextran in the red fluorescence channel) and  
190 adipocytes (SRS imaging channel) in the epidural space. Cells labeled by Texas Red are probably invading  
191 immune cells. Cells shown in the inset with strong pump-probe absorption at  $2863.5\text{ cm}^{-1}$  are red blood  
192 cells indicated by their specific dumbbell shape. Scale bar,  $50\ \mu\text{m}$ . (f) Two-photon fluorescence image of a  
193  $50\text{-}\mu\text{m}$ -thick longitudinal spinal cord slice under the LF window. Scale bar,  $50\ \mu\text{m}$ . (g, h) Evaluation of the  
194 microglial ramification index (g) and number of process endpoints (h) of spinal cord fixed slices from the  
195 LF window group, the dorsal column crush (DCC) group and the negative control (N.C.) group. The  
196 boxplots are shown with median, upper and lower quartiles and maximum and minimum values. Kruskal-  
197 Wallis test: \*\*\*\* $P < 0.0001$ ,  $n \geq 20$  measurements from 6-8 slices per mouse, three mice per group. (i) The  
198 *in vivo* superimposed images of microglia at an interval of two hours, showing ramified microglia  
199 morphology with highly motile processes under the LF window. Scale bar:  $50\ \mu\text{m}$ . (j, k) Changes of the  
200 microglia ramification index (j) and number of process endpoints (k) during two-hour *in vivo* imaging in  
201 the LF window group and the DCC group.  $n \geq 6$  measurements per time point per mouse. Error bars, s.e.m.  
202 (m, n) *In vivo* evaluation of the microglial ramification index (m) and process endpoints (n) of ten mice  
203 with LF window at the first live imaging session. The *in vivo* morphological indices from the three non-  
204 activated mice with LF (LF#1-3 in (g, h)) were used as the gold standard (G.S.) for *in vivo* microglia  
205 activation evaluation. The *in vivo* results from the DCC group were used as the positive control. Microglia

206 activation in each mice was determined by comparing the calculated ramification index and number of  
207 process endpoints with the G.S. Kruskal-Wallis test: \*\*\*\*P < 0.0001,  $n \geq 6$  microglial cells for  
208 morphological quantification for each mouse; the box plots are shown with median, upper and lower  
209 quartiles and max and min values.

210

## 211 **2.2 Optical clearing intervertebral window of retaining ligamentum flavum**

212 Although retaining LF helps to reduce the risk of inflammation caused by surgery, the LF  
213 layer as well as tissues in the epidural space introduces optical scattering to decrease the  
214 penetration depth of spinal cord imaging. After initial surgery, both LF and the epidural space were  
215 infiltrated and filled by a large number of cells, which greatly decreased image contrast and  
216 resolution (**Supplementary Fig. 6**). In this work, optical clearing method was developed to reduce  
217 the optical inhomogeneity of the LF window. Recently, Iodixanol, an FDA approved non-toxic  
218 compound commonly used as a contrast agent during coronary angiography, has been shown to  
219 improve image quality by refractive index matching in live specimens<sup>54</sup>. We tested the  
220 applicability of Iodixanol as an optical clearing medium to facilitate *in vivo* spinal cord imaging  
221 through the LF window. On day1 post-surgery when cell infiltration reduced the transparency of  
222 the window, we applied Iodixanol on top of the LF layer and found a significant improvement in  
223 the window transparency and optical homogeneity after 10 minutes (**Fig. 2a,b**). The application of  
224 Iodixanol restored the image contrast and resolution of both two-photon and stimulated Raman  
225 scattering (SRS) imaging on day 1 to almost the same level as on day 0 (**Fig. 2c-e**). Importantly,  
226 this improvement can be lost by replacing the Iodixanol with saline (**Fig. 2f**) and then recovered  
227 by reapplying Iodixanol (**Fig. 2g**). This phenomenon indicates that the reduction in optical  
228 inhomogeneity should be achieved by refractive index matching rather than by direct removal of

229 scatterers in tissues. Multimodal imaging of the spinal cord with epidural space and ligamentum  
230 flavum showed the tissue structure to be consistent before and after Iodixanol application (**Fig. 2e-**  
231 **g**), which further confirms our hypothesis concerning the optical clearing mechanism of Iodixanol.  
232 By increasing the concentration of Iodixanol up to 60% w/v ( $n \approx 1.429$ ), the improvement in  
233 imaging increased further, indicating better matching of refractive indices (**Supplementary Fig.**  
234 **7**).

235         Next, we investigated how refractive index matching was achieved in the LF window by  
236 using hyperspectral SRS imaging combined with two-photon microscopy. We first acquired the  
237 SRS spectrum of Iodixanol in the fingerprint region ( $1400\text{-}1800\text{ cm}^{-1}$ ) as well as in the Carbon-  
238 Hydrogen (C-H) stretching region ( $2800\text{-}3150\text{ cm}^{-1}$ ) and compared it with typical spectra of lipid  
239 (olive oil) and protein (type I collagen) (**Fig. 2h**). Iodixanol shows a similar spectrum to protein  
240 from  $2800$  to  $3150\text{ cm}^{-1}$ , but has a quite different spectrum profile in the fingerprint region where  
241 there is a unique vibrational peak at  $1523\text{ cm}^{-1}$  contributed by the aromatic ring as well as the  
242 secondary amide II band in its molecular structure<sup>55</sup>. By sweeping the SRS spectrum of the LF  
243 layer immersed in Iodixanol, we found a small SRS peak at  $1523\text{ cm}^{-1}$  that disappeared when  
244 Iodixanol was rinsed out (**Fig. 2i**). Therefore,  $1523\text{ cm}^{-1}$  is a vibrational peak contributed solely by  
245 Iodixanol, which can be used to visualize the Iodixanol distribution without interference from other  
246 endogenous biomolecules. To eliminate non-Raman background interference, a subtraction  
247 method was used to obtain the genuine SRS signal of Iodixanol ( $I_{\text{SRS}} = I_{\text{ON}} - I_{\text{OFF}}$ )<sup>56,57</sup>. Briefly, the  
248 SRS baseline signal (off-resonant,  $I_{\text{OFF}}$ ) at  $1500\text{ cm}^{-1}$  was subtracted from the SRS peak signal (on-  
249 resonant,  $I_{\text{ON}}$ ) at  $1523\text{ cm}^{-1}$  to suppress non-Raman backgrounds (**Fig. 2j**). To investigate the  
250 distribution of Iodixanol through the LF window, we applied multimodal NLO microscopy  
251 combining SRS, TPEF and second harmonic generation (SHG) to visualize Iodixanol, cells and

252 collagens simultaneously. The multimodal images showed that collagen and cellular structures are  
253 spatially correlated with the negative contrast regions in the Iodixanol SRS images ( $I_{SRS}$ ) (**Fig. 2k**),  
254 indicating that Iodixanol achieved refractive index matching primarily by increasing the refractive  
255 index of the interstitial fluid. The clearing effect of Iodixanol becomes worse with time due to the  
256 gradual dilution of the Iodixanol indicated by the decreased SRS signal of Iodixanol between the  
257 window surface and coverslip (**Supplementary Fig. 8, Supplementary Video 1**). Therefore,  
258 Iodixanol was supplemented hourly to maintain good refractive index matching, and the imaging  
259 was usually started 10 min after every Iodixanol administration when its optical clearing effect  
260 reached a plateau (**Supplementary Fig. 8**).

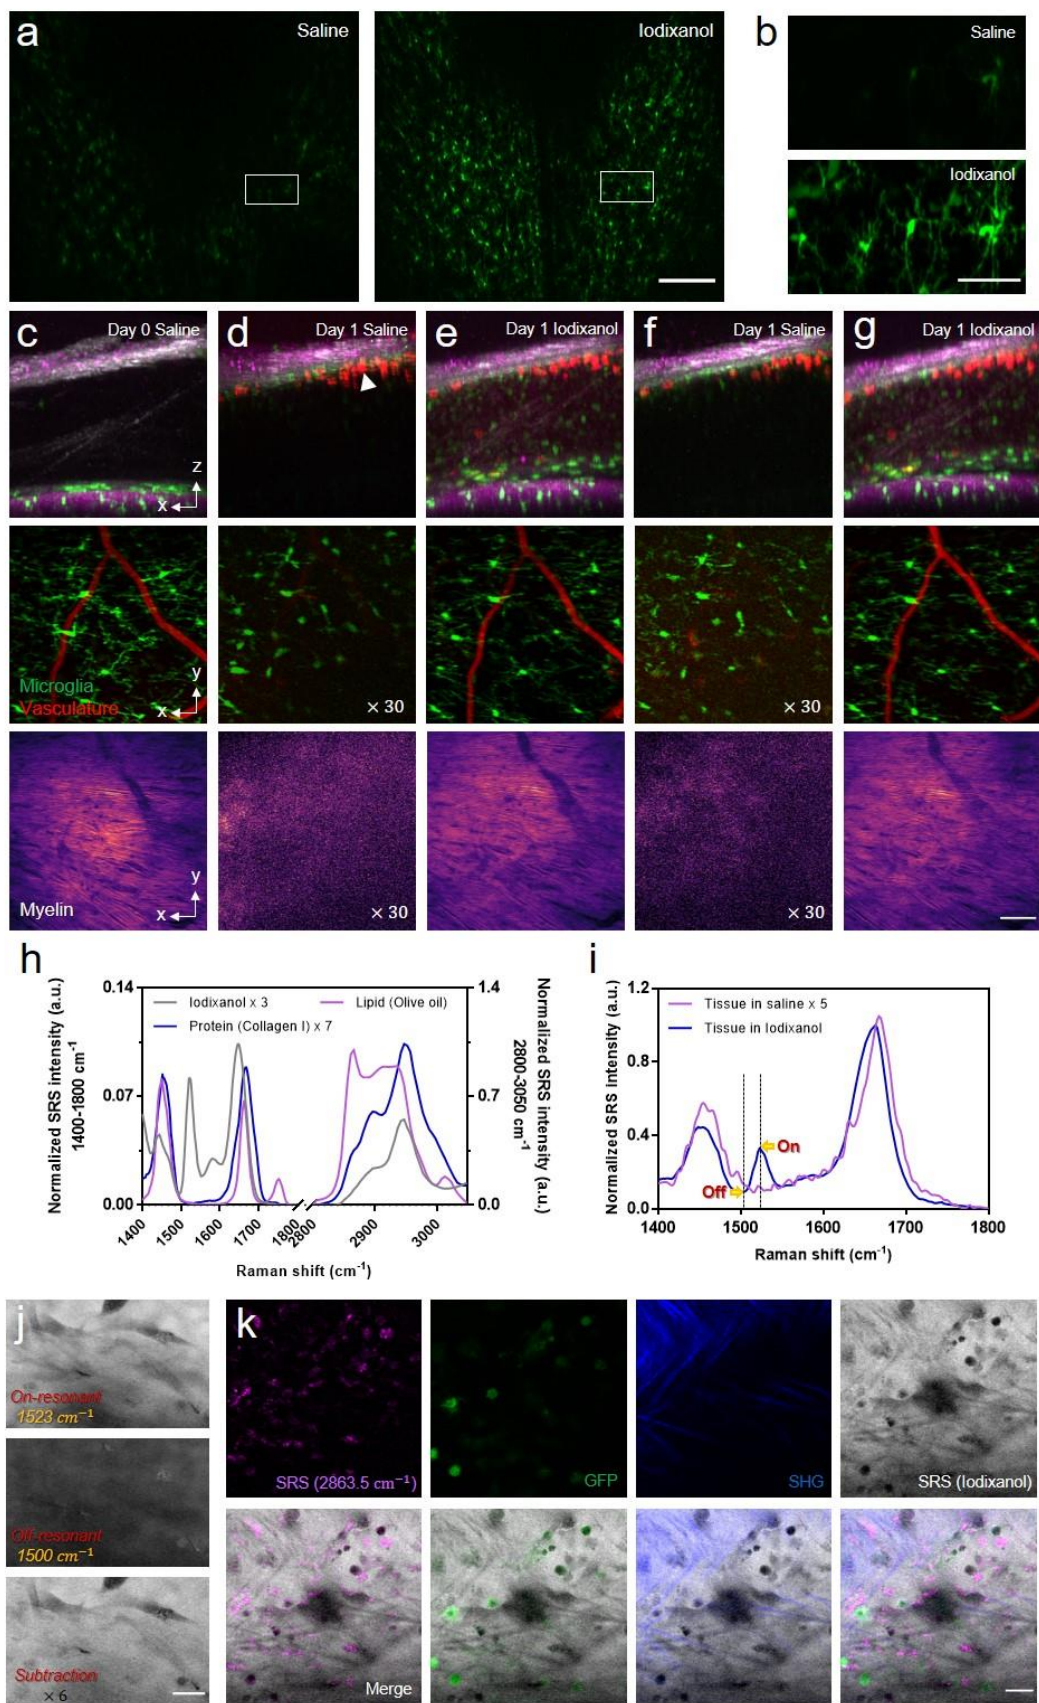

262 **Fig 2. Optical clearance of intervertebral LF window by using Iodixanol.** (a) Maximal projection of a  
263 microglia TPEF image stack under LF window before and after optical clearing on day 1. Scale bar, 200  $\mu\text{m}$ .  
264 (b) Magnification of the box region in (a) shows the detailed microglia image before and after optical  
265 clearing. Scale bar, 50  $\mu\text{m}$ . (c-g) Top row: Maximal x-z projection of the multimodal images of the LF  
266 window. Green, GFP-labeled microglia and other immune cells; Gray: SHG of connective tissues; Red:  
267 Texas Red labeled blood vessels and invading, likely inflammatory cells (white arrowhead); Magenta, SRS  
268 of lipid at Raman shift of 2863.5  $\text{cm}^{-1}$ ; Middle row: the x-y maximal TPEF projection images of microglia  
269 (green) and vasculature (red) under LF window; Bottom row: the x-y maximal SRS projection images of  
270 myelin under LF window. The images were captured on day 0 (c) and day 1 (d-g) after first surgery. On day  
271 1, the window was firstly immersed in saline (d) and then replaced with Iodixanol (e) which was removed  
272 (f) and reapplied (g) again at later times to verify the repeatability of the clearing effect. All the x-z and x-  
273 y projection images were normalized to the same value for each imaging modality. The signal intensity in  
274 x-y projection images of (d) and (f) was digitally enhanced by 30 times for better visualization. Scale bar,  
275 50  $\mu\text{m}$ . (h) The SRS spectra of Iodixanol (60% w/v), protein (Type I collagen) and lipid (Olive oil) at the  
276 fingerprint (1400-1800  $\text{cm}^{-1}$ ) and Carbon-Hydrogen stretching region (2800-3150  $\text{cm}^{-1}$ ). The spectral  
277 intensity was subtracted by the non-SRS background with the flat spectral response and was normalized by  
278 the lipid  $\text{CH}_2$  peak at 2863.5  $\text{cm}^{-1}$ . The SRS spectral intensity of Iodixanol and protein were digitally  
279 enhanced 3 and 7 times for better visualization. (i) On day 9, SRS spectra of the LF layer immersed in saline  
280 and 60% w/v Iodixanol, respectively. The two spectra were normalized by the peak intensity value of the  
281 Iodixanol immersed tissue at a vibrational frequency of 1663.3  $\text{cm}^{-1}$ . The SRS spectral intensity of tissue  
282 immersed in saline was digitally enhanced 5 times for better visualization. (j) The SRS image of the LF  
283 layer immersed in 60% Iodixanol at 1523  $\text{cm}^{-1}$  (on-resonant) and 1500  $\text{cm}^{-1}$  (off-resonant) Raman shift and  
284 their subtraction. Scale bar, 20  $\mu\text{m}$ . (k) The *in vivo* multimodal NLO images of the Iodixanol immersed LF  
285 layer on day 2 showing the distribution of Iodixanol in the interstitial space. Scale bar, 20  $\mu\text{m}$ .

286 Safety issues are a crucial concern when applying optical clearing agent to living animals.  
287 Because of non-toxicity, Iodixanol has long been used as an intravenous X-ray contrast agent<sup>58,59</sup>  
288 as well as a density gradient medium for cell isolation<sup>60</sup>. When applied as a refractive index  
289 matching media for live imaging, Iodixanol doesn't show any toxic effects on living Hela cells,  
290 planarians and zebrafish<sup>54</sup>. In this study, we assessed the effects of exposing the spinal cord to  
291 Iodixanol by exploring microglia activation after optical clearing. We imaged microglia through  
292 the LF window before and 1hr after applying Iodixanol (60% w/v) on day 0 when high-resolution  
293 microglia images still could be acquired without optical clearing. Results show that microglia  
294 remained ramified and continually surveying the microenvironment with highly motile processes  
295 after Iodixanol administration (**Supplementary Fig. 9**). To further assess the potential long-term  
296 effects of exposing the spinal cord to Iodixanol, we continued to image microglia on day 1 and  
297 day 3 with the window treated with Iodixanol (60% w/v). Time-lapse *in vivo* imaging shows that  
298 all the microglial cells in the FOV retained ramified morphology with dynamic processes,  
299 indicating no inflammation (**Supplementary Fig. 9**). Collectively, these results demonstrate that  
300 applying Iodixanol to the intervertebral window does not impact the spinal cord, largely alleviating  
301 safety concerns.

302 Since optical clearing by Iodixanol can significantly increase the window clarity without  
303 activating microglia, we next explored the potential of this optical cleared intervertebral window  
304 for minimally invasive longitudinal imaging. We conducted time-lapse multimodal NLO imaging  
305 of four Cx3CR1-GFP mice through the window and achieved up to 16 imaging sessions over 167  
306 days without observing microglia activation (**Fig. 3**). It was found that on day 0, optical clearing  
307 significantly increased the transparency and optical homogeneity of the whole window  
308 (**Supplementary Fig. 10**). Within the first week after initial surgery, scar tissue at the surgical site



309 has not developed fully and the large interstitial space below the LF layer allowed easy matching  
310 of refractive indices by Iodixanol and therefore permitted high-resolution fluorescence imaging  
311 (**Supplementary Fig. 11**). The improvement of fluorescence and SRS signal by optical clearing  
312 on day 4 reached about 20 times (**Supplementary Fig. 11c-f**). Usually a week later, scar tissue  
313 developing with collagen, blood vessels, and recruited dense cells, severely degraded the window  
314 transparency and reduced the optical clearing effect (**Supplementary Fig. 11,12**). Therefore, it is  
315 necessary to remove the newly grown tissue above the LF layer. Due to the mechanical toughness  
316 of the LF layer, the loose granulation tissue at the top of the window can be easily distinguished.  
317 The precise surgical removal of scar tissue leaving the LF layer intact can be achieved with a high  
318 success rate. After tissue removal and Iodixanol treatment, spinal cord images with subcellular  
319 resolution could be recovered (**Supplementary Fig. 12**). During each imaging session, to  
320 equilibrate the heterogeneous refractive indices, Iodixanol was applied to the surface of the  
321 intervertebral window prior to NLO imaging. Although the structure of the LF window varies with  
322 time, optimal refractive index matching was always reached at about 10 min after Iodixanol  
323 treatment (**Supplementary Fig. 11f**). Therefore, Iodixanol was supplemented every hour and  
324 imaging was usually started 10 min after every Iodixanol administration.

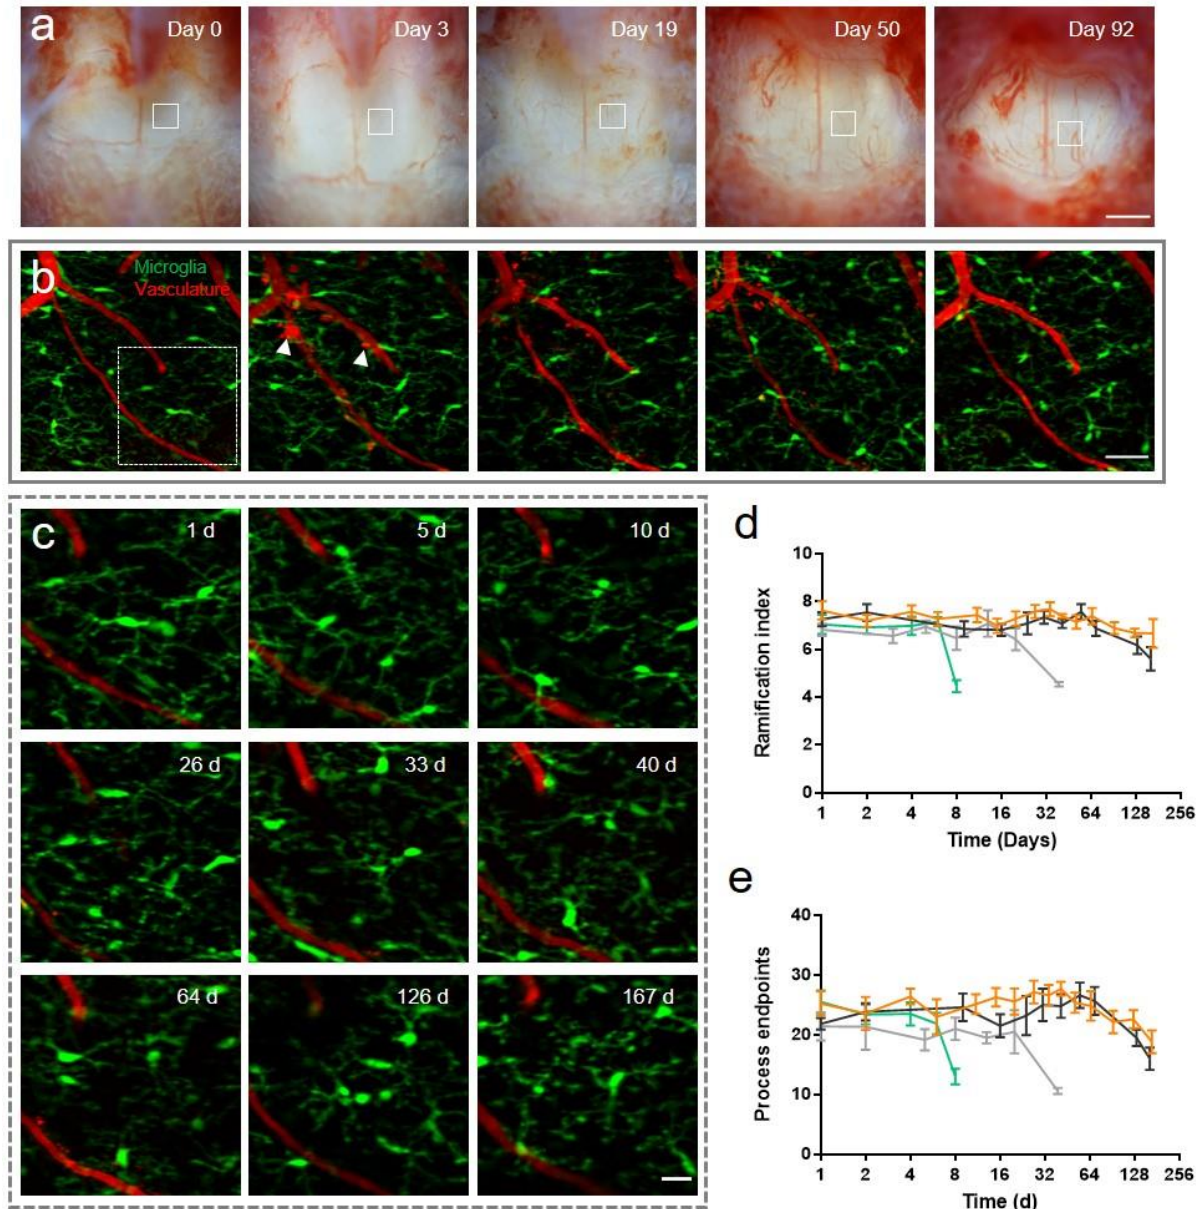

325

326 **Figure 3. Long-term spinal cord imaging through optically cleared LF windows.** (a) Bright-field

327 images of an LF window over three months. Scale bar, 500  $\mu\text{m}$ . (b) Maximal projections of microglia (green)

328 and vasculature (red) image stacks at the same site in the box region of (a). Vasculature labeled by Texas

329 Red dextran was used to navigate to the same region of interest in different imaging sessions. The

330 arrowheads indicate Texas Red dextran labeled perivascular cells and invading, likely inflammatory cells

331 above the spinal cord. Scale bar, 50  $\mu\text{m}$ . (c) Magnification of the box region in (b) shows the detailed

332 structures of microglia (green) and vasculature (red) at indicated times. Scale bar, 50  $\mu$  m. (d, e)  
333 Ramification index (d) and number of process endpoints (e) as functions of time during longitudinal two-  
334 photon fluorescence imaging. Each curve represents the statistical data of one mouse. For statistics of  
335 ramification index and number of process endpoints, 6-10 microglial cells with intact and clear morphology  
336 (contrast >0.97) were analyzed at each time point. The longitudinal study was terminated when microglial  
337 activation was observed, or the imaging region of interest was lost because of the shrunken field of view.  
338 Error bars, s.e.m.

339 We evaluated the inflammation response by morphological analysis of microglia in each  
340 imaging session. Microglial cells in the same region of interest (ROI) with intact and clear  
341 morphology (contrast > 0.97) (**Supplementary Fig.13**) were selected for morphological  
342 quantification. The statistics of RI and NPE show that microglia activation with significantly  
343 decreased ramification was observed on day 8, day 39 and day 161 in three mice (**Fig. 3d,e**),  
344 respectively, due to accidental touch to the spinal cord by surgery tools when scar tissue removal  
345 was required. One mouse of four was imaged for as long as 167 days without inflammation (**Fig.**  
346 **3a-c**), but the ROI was lost on day 203 because of the decreased FOV of the intervertebral window.  
347 From the bright-field images of the two mice which were imaged for more than 160 days, we  
348 observed the intervertebral window becoming smaller over time because of the growth of the  
349 surrounding rigid connective tissues (**Supplementary Fig. 14**), which limits the time span of the  
350 intervertebral window.

351

### 352 **2.3 Multimodal NLO imaging of axonal degeneration after laser axotomy**

353 Using double transgenic mice expressing EYFP in dorsal root ganglion afferent neurons  
354 and EGFP in microglia, we evaluated the response of axons and microglia to laser-induced injury.

355 Axons and surrounding myelin sheaths were imaged together with microglia using our multimodal  
356 NLO microscope. YFP and GFP signals were differentiated using a spectral unmixing method as  
357 previously described<sup>61</sup>. We conducted precise single axon axotomy using tightly focused  
358 femtosecond laser pulses (**Fig.4, Supplementary Fig. 15**). Microglia responded rapidly to the  
359 injury by extending their cytoplasmic processes towards the lesion (**Supplementary Fig. 15b,**  
360 **Supplementary video 2**). The proximal end of the axon underwent acute degeneration within an  
361 hour post injury, and the surrounding myelin sheath kept close contact with the axon during  
362 degeneration (**Supplementary Fig. 15c**). After 1 day, dieback of the proximal ends slowed down  
363 and a large number of microglia as well as bone marrow-derived macrophages (BMDMs)<sup>62</sup> were  
364 recruited to the injury site. Thanks to the precise laser axotomy on a single axon and high-  
365 resolution *in vivo* fluorescence imaging, we could observe clearly the spatially confined  
366 microglia/macrophage distribution strictly along the axonal degeneration path (**Fig. 4a**). Though  
367 the influx of microglia and BMDMs has been shown to correlate with axonal dieback<sup>62,63</sup>, our  
368 imaging-guided laser microsurgery along with longitudinal imaging permits study of the  
369 interaction between microglia/macrophages and injured axons in a much higher resolution both  
370 temporally and spatially. The results show that 1 day post injury (dpi), microglia mainly  
371 aggregated at the lesion site. At 3 dpi, however, the microglial aggregation moved along the  
372 direction of axon degeneration and kept physical contact with the proximal end of the injured axon.  
373 At 8 dpi, the aggregation disappeared and microglia were redistributed homogeneously in the FOV  
374 (**Fig. 4a-b**). This spatiotemporal distribution of microglia/macrophages could be correlated with  
375 its cellular function of tissue debris clearance. At 3 dpi, microglia/macrophages phagocytosis of  
376 the myelin and axon debris along the axonal degeneration path was observed (**Fig. 4c**). Our time-  
377 lapse multimodal imaging showed that the amount of myelin debris was significantly reduced,

378 corresponding with the decreased density of microglia/macrophage at 8 dpi, with only a few debris  
379 left inside the cell bodies of myelin-laden microglia/macrophages (**Fig. 4d**). These results provide  
380 crucial *in vivo* evidence to support previous studies that observed microglia/macrophage  
381 engulfment of axon and myelin debris based on postmortem analysis<sup>64,65</sup>.

382 In addition to the phagocytosis of axon and myelin debris, microglia and macrophages were  
383 also reported to mediate axonal dieback by forming cell to cell contacts with the dystrophic endings  
384 of injured axons<sup>62,63,66</sup>. At 1 dpi, the injured axon formed an enlarged endbulb where the  
385 surrounding myelin sheath was lost (**Fig. 4e**). Interestingly, an axonal fragment was loosely  
386 connected to the enlarged proximal ends and surrounded by microglia/macrophages (**Fig. 4e**). It  
387 looks like the microglia/macrophages were pulling and stretching the fragment from the proximal  
388 end, as suspected in a previous study<sup>63</sup>. On the third day after injury, even stronger physical contact  
389 was observed between the microglia/macrophages and the proximal axonal end. Despite closely  
390 contacted by microglia/macrophages, the injured axon had limited secondary degeneration after  
391 day 1, and conversely, it showed early signs of regeneration. At 3 and 8 dpi, the dystrophic  
392 proximal ends became thinner and exhibited growth cone like structures with a small regeneration  
393 length of 12  $\mu\text{m}$  from 3 to 8 dpi. (**Fig. 4e**).

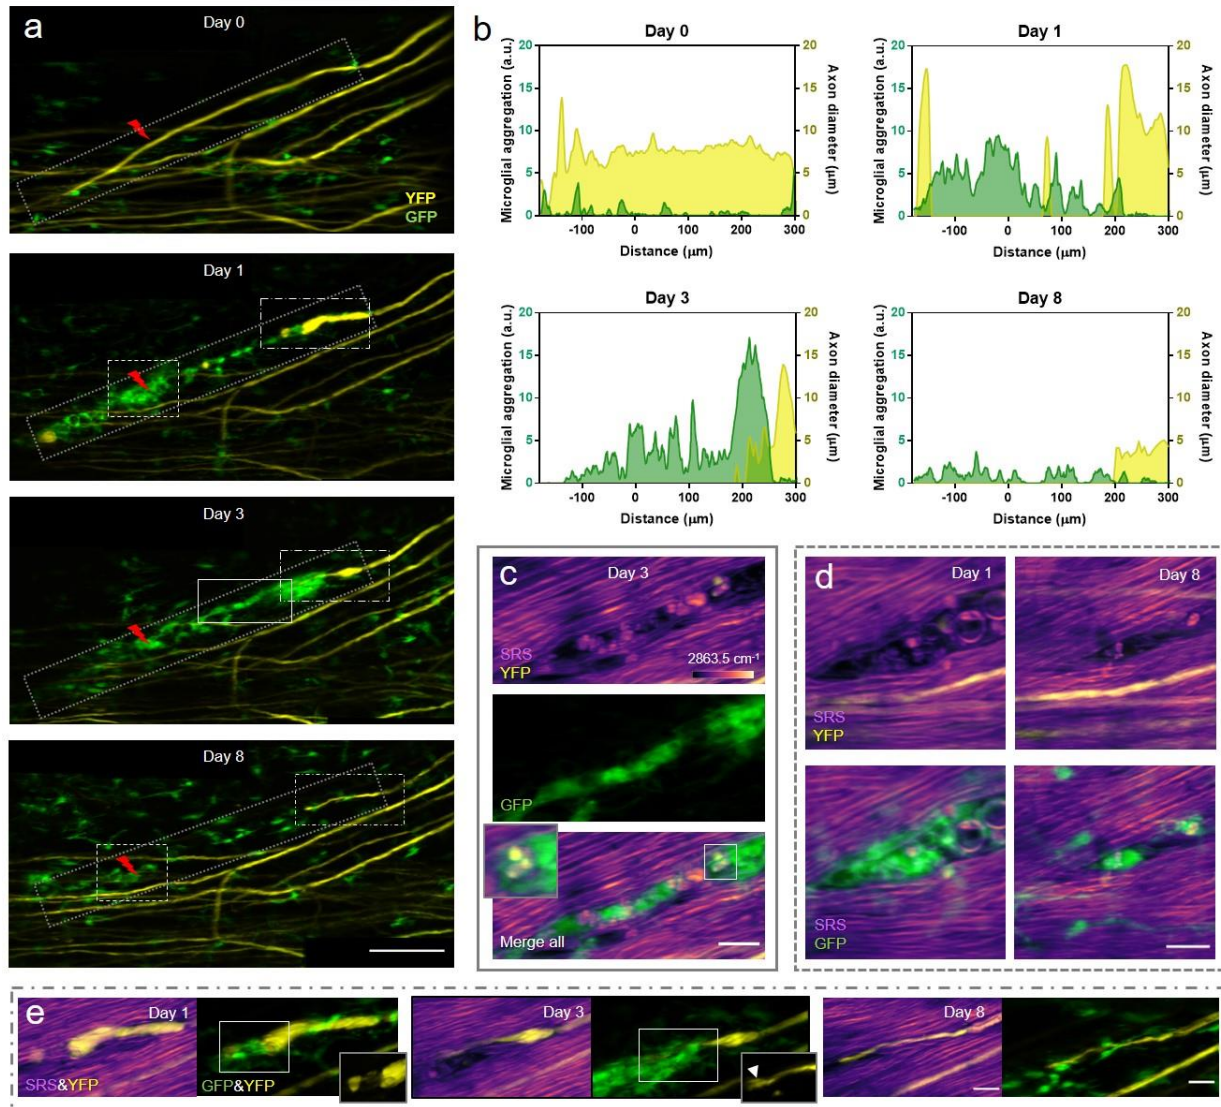

394

395 **Figure 4. *In vivo* multimodal NLO imaging of axonal degeneration after laser axotomy.** (a) Maximal  
396 z intensity projections of TPEF image stacks of YFP labeled axons (yellow) and GFP labeled microglia  
397 (green) at indicated times before and after laser axotomy. The lightning bolt symbol indicates the lesion  
398 site. Scale bar, 100  $\mu\text{m}$ . (b) The dynamics of the distribution of microglia (green) along the axonal  
399 degeneration path and the diameter of the injured axon (yellow). Only microglial cells located in the dot  
400 rectangular region along the degenerating axon in (a) were included for analysis. (c) The multimodal image  
401 of the spinal cord in the solid box region in (a) shows resident microglia and/or recruited macrophage  
402 aggregation along the axonal degeneration path at 3 days post injury (dpi). Colocalization of axon (yellow)

403 and myelin (magenta) debris and microglia (green) indicates phagocytosis of microglia/macrophages. Insets,  
404 a zoomed-in view of myelin and axon debris colocalized with microglia/macrophage. (d) The multimodal  
405 images taken at 1dpi and 8 dpi in the dashed box region in (a) show the initialization and finalization of  
406 debris clearance, respectively. (e) The zoomed-in multimodal images of the axonal proximal end at  
407 indicated time points. The imaging area corresponds to the long dash-dot box region in (a). For clear  
408 visualization, the merged SRS and YFP images are shown as a single slice, while the merged GFP and YFP  
409 images are shown as the maximum z projections of image stacks. Insets, YFP images of the axonal proximal  
410 end. The arrowhead denotes small sprouts emerging from the tip of the axon. SRS images of myelin were  
411 taken at Raman shift of  $2863.5\text{ cm}^{-1}$ . Scale bars in (c-e),  $20\ \mu\text{m}$ .

412 In addition, we also investigated microglial behavior and microglia-axon interaction  
413 following severe spinal cord injury by inflicting injury by laser over a large area (**Supplementary**  
414 **Fig. 16**). Large macrophage aggregations were observed at the lesion site at 1 dpi and expanded  
415 further in the following days. Compared with the phenomena observed in the single axon injury,  
416 the strict spatial correlation between the microglia/macrophage distribution and individual axonal  
417 degeneration path was not observed, probably because of the large size of the injury. In addition,  
418 the macrophage aggregation remained at the lesion site for at least a month, suggesting long-lasting  
419 inflammatory activity. The injured axon underwent acute and subacute degeneration within the  
420 first three days and then became almost immobilized in the following weeks. As we observed  
421 previously, the axonal ends first became enlarged and then thinned with sprouts appearance at 3  
422 and 8 dpi. As can be seen, by taking advantage of the multimodal NLO imaging with high  
423 spatiotemporal resolution, we demonstrated a reliable model to study the highly dynamic processes  
424 of debris clearance and glia-neuron interactions during tissue injury and remodeling under finely  
425 controlled injury conditions.

426

## 427 **2.4 Dynamic interaction between microglia and the nodes of Ranvier**

428 Nodes of Ranvier, known as myelin-sheath gaps, are characterized by short and periodic  
429 regions of the axonal membrane that are bare of myelin<sup>67,68</sup>. The axolemma at nodes of Ranvier is  
430 exposed directly to the extracellular matrix and is highly enriched in ion channels, which permit  
431 the rapid exchange of ions to regenerate the action potential<sup>68</sup>. Therefore, nodes of Ranvier play a  
432 key role in fast saltatory propagation of action potentials. In the CNS, myelinating  
433 oligodendrocytes don't form nodal microvilli, allowing glial cells to contact the uninsulated  
434 axolemma directly at the nodes of Ranvier. Using immunofluorescent staining and electron  
435 microscopy, a recent study revealed direct contact between microglia processes and the nodes in  
436 rat corpus callosum<sup>69</sup>, although the physiological role of the contact remains elusive. Here, we  
437 assessed microglia-axon contacts at the nodes of Ranvier *in vivo* using Thy1-YFP/Cx3Cr1-GFP  
438 double transgenic mice and studied the dynamic behavior of microglia-node interactions during  
439 axonal degeneration induced by laser axotomy. Specifically, the position of nodes was first  
440 confirmed by merging the SRS image of myelin and the TPEF image of YFP labeled axons. As  
441 can be seen, at the nodes of Ranvier the axon is not wrapped by myelin and exhibits a decreased  
442 diameter compared with the internode regions (**Fig. 5a**). First, we conducted 1-hour time-lapse  
443 multimodal imaging of the spinal cord through the LF window. As expected, the microglial cells  
444 under the window displayed ramified morphology with highly motile processes. Interestingly, we  
445 observed that a large proportion of nodes (72.4%, n=21) were contacted by microglial processes  
446 (**Fig. 5b**). Notably, there were a small number of nodes (17.2%, n=5) showing constant contact  
447 with microglia, with one of the microglial processes sticking to the node of Ranvier and remaining  
448 stable over time (**Fig. 5c**). Nevertheless, most of the microglia-node contacts were intermittent  
449 (55.2%, n=16), occurring as microglial processes randomly scanning over the surrounding



450 environment (**Fig. 5d**). In addition, we also observed that a microglial cell can access two nodes  
451 of Ranvier simultaneously with its highly branched processes (**Fig. 5d**), showing the diversity of  
452 microglia-node interactions. Then we explored this contact at the nodes of injured axons. Time-  
453 lapse imaging was performed for an hour before and almost immediately after laser axotomy on a  
454 single axon (**Fig. 5f**). To avoid directly influencing the behavior of microglia around nodes of  
455 Ranvier, laser axotomy was performed at least 200  $\mu\text{m}$  distal to the target node (**Supplementary**  
456 **Fig. 17**). After every laser injury, we monitored the dynamics of the microglia around the node  
457 and found that their processes were not recruited to the lesion site, suggesting that this precisely  
458 controlled distal injury method can exclude the laser-induced microglial response and thus  
459 provides an ideal means to study the specific microglial behaviors related to axonal degeneration.

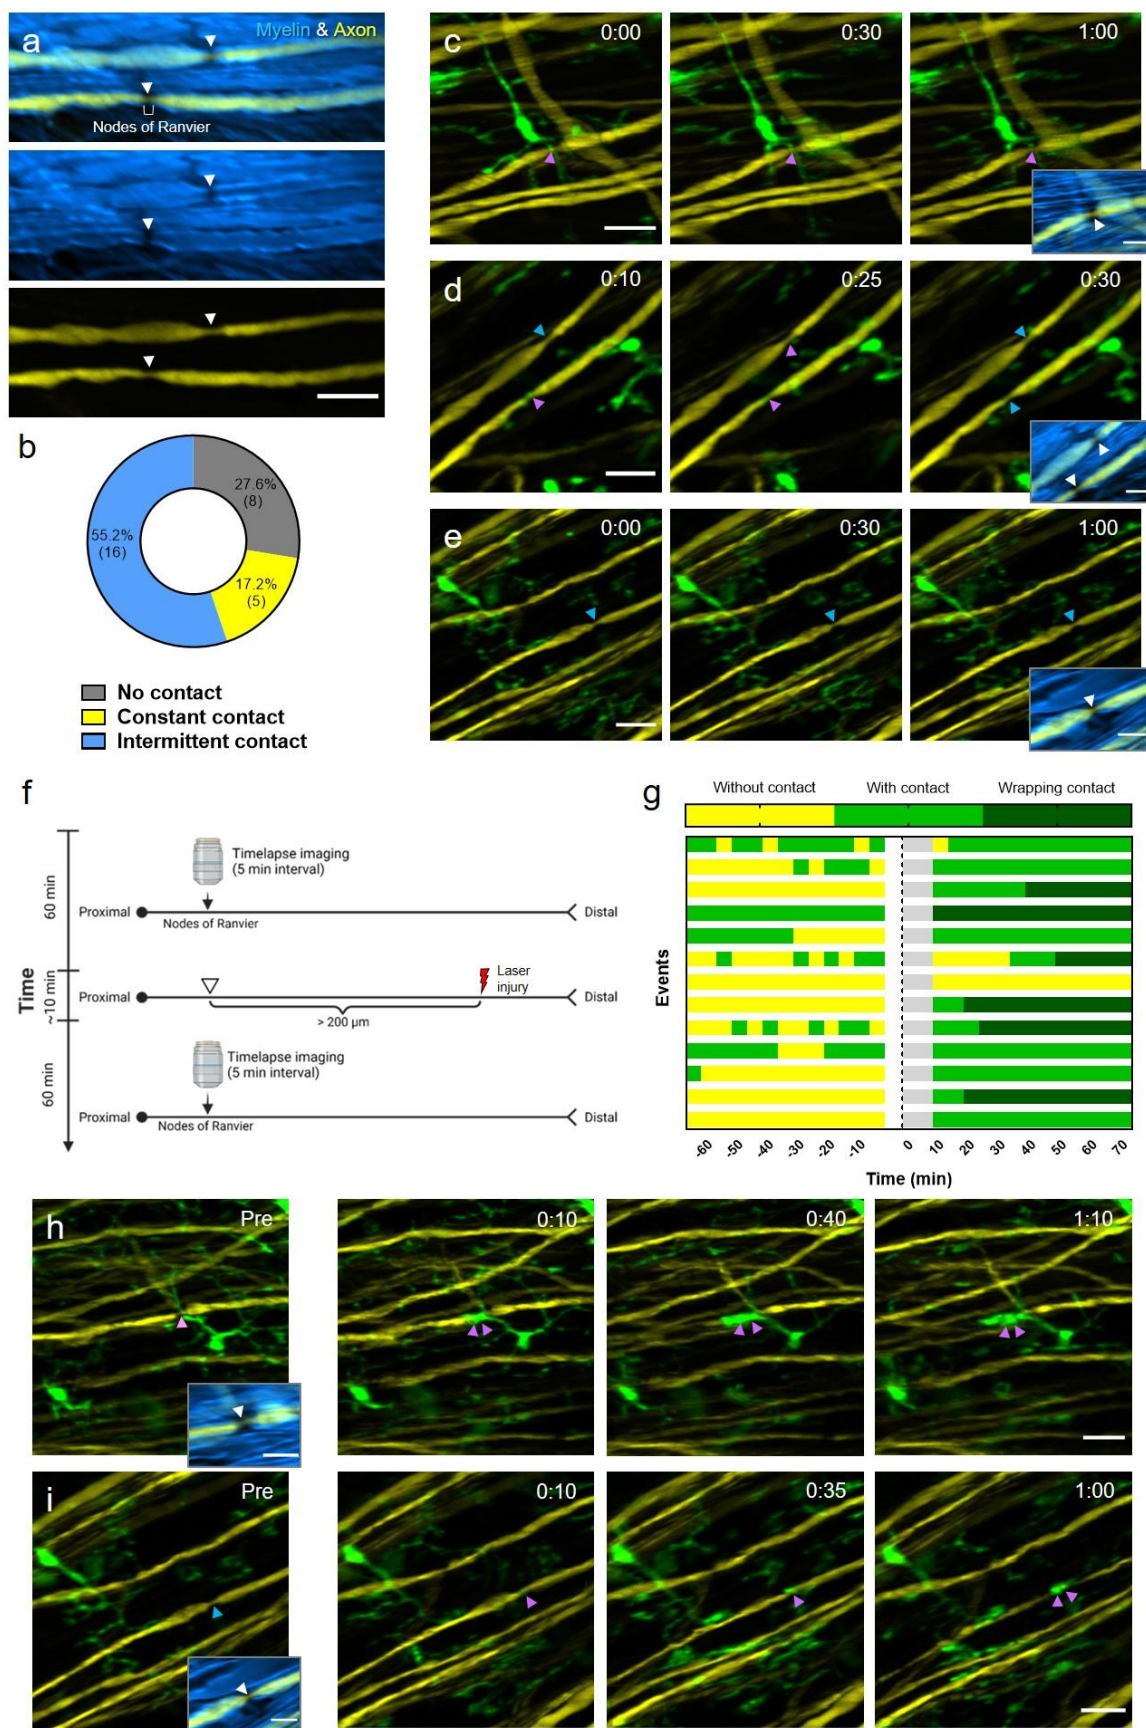

461 **Figure 5. Dynamic contact between microglia and the nodes of Ranvier.** (a) The overlay of the SRS  
462 image of myelin (blue) and the TPEF image of YFP axon (yellow) shows the structure of the nodes of  
463 Ranvier. Arrowheads denote the locations of nodes. Scale bar, 20  $\mu\text{m}$ . (b) The categorization and statistics  
464 of microglial contact with the nodes of Ranvier. Totally 29 nodes were studied by 1-hour live imaging. (c-  
465 e) Representative results of constant contact (c), intermittent contact (d) and no contact (e) between  
466 microglia (green) and the nodes of Ranvier (arrowheads) during 1-hour time-lapse imaging. Insets, overlay  
467 of the SRS image of myelin (blue) and the TPEF image of axons (yellow) showing the position of nodes  
468 (white arrowheads). Purple arrowheads indicate nodes with microglial contact, while blue arrowheads  
469 indicate nodes with no microglial contact. Scale bar, 20  $\mu\text{m}$ . (f) Illustration of the experimental design.  
470 Single-axon laser axotomy was conducted at more than 200  $\mu\text{m}$  away from the target node of Ranvier to  
471 avoid direct laser-induced microglial activation near the nodes. (g) Quantification of microglia-nodes  
472 contact before and after laser axotomy. Each bar represents a node of Ranvier. The blank and grey areas on  
473 the bars denote the time for laser injury and imaging setup when imaging was not performed. Laser injury  
474 was performed at time 0. (h, i) Representative time sequence images of nodes with wrapped contacts with  
475 microglia after axon injury. Before injury, the node in (h) has constant contact with microglia, while the  
476 node in (i) has no contact with microglia. After injury, wrapping contacts with nodes enveloped by  
477 microglia processes are indicated with double purple arrowheads. Time post injury is presented as hr : min.  
478 Scale bar, 20  $\mu\text{m}$ . Insets, overlay of myelin SRS image and axon fluorescence image. Scale bar for all the  
479 insets, 10  $\mu\text{m}$ .

480 Strikingly, we found that after injury at the distal end of the axon, the nodes of Ranvier  
481 were contacted by microglial processes significantly more frequently (**Fig. 5g**). Among the 12  
482 nodes of Ranvier which had no contact or intermittent contact with microglia before laser injury,  
483 10 nodes attracted microglial processes within 15 min after axotomy and remained in constant  
484 contact during the following hour. Moreover, in some cases, microglial processes were intensively  
485 recruited and fused to the nodes, forming an enlarged containment around the nodes (**Fig. 5h,i**,

486 **supplementary video 3-5**). This wrapping contact was observed in about half the nodes (6/13).  
487 These results show that the microglia-node contact is strongly regulated in the injured axons.  
488 Although the mechanisms underlying the pronounced changes in microglia-node interactions  
489 remain unclear, it is suggested that microglia dynamics can be modulated by the concentration of  
490 cations such as potassium ( $K^+$ )<sup>32</sup> and calcium ( $Ca^{2+}$ )<sup>70,71</sup>. At the nodes of Ranvier, where action  
491 potentials regenerate, large amount of  $K^+$  and  $Na^+$  are rapidly exchanged on the uninsulated  
492 axolemma<sup>68</sup>. In addition, calcium influx through the nodes is reported to happen in a manner  
493 dependent on neuron activity<sup>72,73</sup>. Therefore, microglia contact with nodes of Ranvier may be  
494 closely associated with the change of  $K^+$  and/or  $Ca^{2+}$  concentrations around the nodes. As laser  
495 axotomy disrupts the axolemma and surrounding myelin, it would cause a rapid depolarization and  
496 an occasional burst of action potentials<sup>74</sup>. Therefore, it is rational to speculate that laser axotomy  
497 may affect the concentrations of cations around the node, which further modulates microglia-node  
498 contact. Meanwhile, as a unique pathological response triggered by axon injury, the strengthened  
499 contact between microglial processes and nodes of Ranvier may offer valuable insights into the  
500 regulation of axon-glia interactions during the neurodegeneration process. With this *in vivo* spinal  
501 cord imaging method based on the minimal-invasive intervertebral window and multimodal NLO  
502 microscopy, we demonstrated a promising way to study the dynamic interaction between the nodes  
503 of Ranvier and microglia under normal and injury condition, opening a door for future studies  
504 associated with the functions of the nodes of Ranvier.

505

506

507 **3. DISCUSSION**

508 Since spinal microglia plays a crucial regulatory role in homeostasis<sup>21</sup>, neurodevelopment<sup>75,76</sup>, and  
509 neuronal degeneration or regeneration<sup>62,76-78</sup>, during the surgical preparation of the intervertebral  
510 window for chronic imaging, it is of great importance to avoid activating the spinal microglia in  
511 order to maintain the native microenvironment of the spinal cord. In this study, we demonstrated  
512 the use of a minimally invasive intervertebral window with an optical clearing method and NLO  
513 microscopy to achieve long-term (167 days), repetitive (16 times), high-resolution (subcellular  
514 structure-resolved), and most importantly, inflammation-free (microglia inactive) imaging of  
515 mouse spinal cord *in vivo*. To improve the integrity and rigidity of the intervertebral window, we  
516 retained the ligamentum flavum to serve as a buffer for any mechanical force to the spinal cord  
517 caused by surgery. This is a key procedure to protect the underlying spinal cord tissue and  
518 dramatically reduce the possibility of window preparation activating inflammation. A side effect  
519 is that newly generated tissues above and below the ligamentum flavum will gradually lower the  
520 window's clarity and reduce the quality of imaging. To solve this problem, we gently removed the  
521 newly grown tissues above the ligamentum flavum, and more crucially, we applied an optical  
522 clearing method using Iodixanol as the clearing medium to reduce the photon scattering caused by  
523 the window and successfully restore subcellular imaging resolution for more than 160 days.  
524 Importantly, by monitoring the morphology of microglia after optical clearing using high-  
525 resolution two-photon imaging, we confirmed that administering Iodixanol on the surface of the  
526 window does not activate an inflammatory response in the spinal cord, making it a reliable way to  
527 improve imaging performance without disturbing spinal homeostasis. We also tested widely  
528 reported optical clearing agents, glycerol (**Supplementary Fig. 18**) and PEG400 (**Supplementary**  
529 **Fig. 19**). We found that both agents induced activation of microglia and offered limited  
530 improvement for two-photon imaging through the window. However, the optical clearing

531 technique based on Iodixanol allows us to remove less tissue from the surface of the window while  
532 not compromising imaging quality, thus reducing the risk of activating inflammation by surgery.  
533 With these improvements in window preparation, we managed to conduct repetitive surgery  
534 without activating microglia with a high success rate (90%, 36/40) and achieved 16 imaging  
535 sessions over 167 days, which is sufficient for the longitudinal study of chronic disorders in the  
536 spinal cord, such as multiple sclerosis<sup>79,80</sup>, spinal cord injury<sup>81</sup> and neuropathic pain<sup>82</sup>.

537         The microglial morphology was used as an *in vivo* indicator of inflammatory activity. It  
538 has been reported previously that as well as the two conventional forms of resting and activated  
539 state, microglia may display an intermediate state in which cells preserve a branched morphology  
540 under pathological stimuli<sup>30</sup>. This is because microglial activation and the resultant morphological  
541 transformation is a gradual process, and may have diverse responses to pathological conditions  
542 and functional states<sup>31,83</sup>. Indeed, this progressive, heterogeneous alteration in microglial  
543 morphology during the activation process may disturb the accuracy of judgments of the activation  
544 states of individual microglia based on morphology. Nevertheless, it is widely accepted that  
545 inflammation in local tissues can be determined objectively by rigorous statistical analysis of the  
546 average morphological parameters of a large population of microglia in the ROI<sup>30,36,47</sup>.  
547 Furthermore, it has been observed that microglial activation in response to acute CNS injury is  
548 usually rapid and most of the microglial cells near the lesion site can quickly retract processes and  
549 even acquire the amoeboid phenotype within a few hours of the stimulus<sup>22,84</sup>. Therefore, in order  
550 to assess the extent of inflammatory activation during the preparation of a spinal cord window, we  
551 conducted quantitative and statistical characterization of the ramification index and process  
552 endpoints of the spinal cord microglia using time-lapse *in vivo* imaging.

553 By using a home-built multimodal NLO microscope system that integrates TPEF, SHG  
554 and SRS imaging, we achieved simultaneous visualization of a variety of structures in and above  
555 the spinal cord, including axons, myelin, microglia, blood vessels, collagen, lipid, etc., facilitating  
556 our understanding of the remodeling of the complex microenvironment in the intervertebral  
557 window during longitudinal imaging. This multimodal imaging plays a crucial role in  
558 characterizing the biophysical and biochemical properties of the intervertebral window,  
559 monitoring the axon-glia dynamics following laser injury, and identifying the microglial contacts  
560 with the nodes of Ranvier. In addition, our two-photon laser microsurgery provides an ideal model  
561 for studying spinal cord injury in a well-controlled manner and specifically, single axon injury in  
562 the dorsal column area. As well as the advanced imaging tool, another indispensable factor for  
563 high-resolution spinal cord imaging is that we established a custom-designed stabilization stage to  
564 minimize the influence of mice breathing during imaging, and also applied rigorous image  
565 registration algorithms to correct residual motion artifacts.

566 It should be noted that although the sub-cellular resolution of two-photon spinal cord  
567 imaging can be achieved most of the time through tissue removal and optical clearing, clear images  
568 may be hard to acquire when newly generated blood vessels in the epidural space are densely  
569 distributed right above the ROI. Further, optical clearing showed smaller improvement for SRS  
570 imaging compared to two-photon imaging. This probably results from the chromatic aberration  
571 introduced by the optical cleared LF window since SRS generation depends critically on the spatial  
572 overlap of the pump and Stokes beams at the focal point. To further improve the image quality  
573 under the LF window in the future, adaptive optics could be introduced and integrated into the  
574 NLO microscope to compensate for the monochromatic and chromatic aberrations caused by the  
575 window. It is also worth noting that the effective area of the intervertebral window decreased

576 significantly after 3 months because of the growth of surrounding rigid tissues that are difficult to  
577 remove. Therefore, to avoid losing the longitudinal traced ROI due to the decreased FOV, it is  
578 preferable to use the central region of the window for extremely long-term imaging. With the  
579 future development of advanced microscopy techniques, this proposed optically cleared LF  
580 window will serve as a robust and general tool for neuroscientists to understand cellular dynamics  
581 in the spinal cord under physiological and pathological conditions in a live mouse model.

582



#### 583 4. METHODS AND MATERIALS

584 **Animal preparation.** Heterozygous Cx3Cr1-GFP (B6.129P2(Cg)-Cx3cr1tm1Litt/J)<sup>85</sup> transgenic  
585 mice which express EGFP in microglia were used to characterize the inflammatory activation in  
586 the spinal cord. To study axon-glia interaction, Cx3Cr1-GFP mice were crossed with Thy1-YFP  
587 (Tg(Thy1-YFP)HJrs/J)<sup>86</sup> mice to generate the Thy1-YFP/Cx3Cr1-GFP transgenic line for  
588 simultaneous imaging of axon and microglia in the spinal cord. All the mice used for imaging  
589 experiments were 2-6 months old. Before surgery, all required tools were sterilized by autoclaving.  
590 All surfaces which would be touched during surgery were disinfected with 70% ethanol. A sterile  
591 field was created for surgery by covering the working area of benchtop with sterile drapes. Mice  
592 were anesthetized by intraperitoneal (i.p.) injection of ketamine-xylazine mixture (87.5 mg kg<sup>-1</sup>  
593 and 12.5 mg kg<sup>-1</sup>). Hair on the dorsal surface above the thoracic spine was shaved and completely  
594 removed using depilating cream. The dorsal surface was disinfected using iodine solution. A small  
595 (~1.5 cm) midline incision of the skin was made over the T11-T13 vertebra to expose the dorsal  
596 tissue (**Supplementary Fig. 4b**). Muscles and tendons on both the top and sides were severed so  
597 that the spine can be held stably by clamping the vertebra with two stainless steel clamping bars  
598 on a custom-designed stabilization stage (**Supplementary Fig. 4c**). During the surgery, sterile  
599 gauze pads and sterile saline were used to control bleeding and clean the wound. The surface of  
600 the stabilization stage was maintained at around 37° through a heating pad to keep mice warm  
601 during surgery. All animal procedures performed in this work were conducted according to the  
602 guidelines of the Laboratory Animal Facility of the Hong Kong University of Science and  
603 Technology (HKUST) and were approved by the Animal Ethics Committee of HKUST.

604 *Intervertebral window.* The surgical procedures for preparing conventional intervertebral  
605 windows were modified according to a previous protocol<sup>19,20</sup>. Briefly, the muscle tissues and

606 tendons in the cleft between the vertebra arcs T12 and T13 were completely removed. The  
607 ligamentum flavum was carefully peeled using a fine-tip tweezer, while the dura was left intact.  
608 The exposed spinal cord was kept moist by irrigating with saline. To prepare the improved  
609 intervertebral window with ligamentum flavum, care should be taken to keep the ligamentum  
610 flavum unblemished when removing the muscle and tendon in the intervertebral space  
611 (**Supplementary Fig. 4d**). In particular, after the window with ligamentum flavum has been  
612 exposed, the tweezer tip should not touch the surface of the window during surgery. This is  
613 important to avoid inducing microglia activation. Moreover, when cleaning tissue with a saline  
614 flush and gauze pad, direct contact with the window surface should also be avoided. To prepare  
615 for the imaging, a coverslip was then placed on the clamping bar, and the interspace between the  
616 coverslip and the spinal cord was filled with saline or Iodixanol (**Supplementary Fig. 4e**). After  
617 imaging, the medium below the coverslip was removed and the surgical area was carefully cleaned  
618 using saline and gauze pads. The top area of the surgical window was then covered by liquid Kwik-  
619 Sil (World Precision Instruments) to protect it (**Supplementary Fig. 4h**). After the Kwik-Sil got  
620 cured (~3min), the skin on the surgical site was sutured and covered with burn cream (Betadine)  
621 to protect from infection. Mice were placed on a heating pad until they recovered fully from  
622 anesthesia. For reimaging through the same intervertebral window with ligamentum flavum, the  
623 sutured skin was reopened and the covering Kwik-Sil gel was removed. Tissues adhering to the  
624 side of the T11-T13 vertebra were detached to enable stable clamping of the spine. If reimaging  
625 was performed within four days of the initial surgery, granulation tissue had not formed at the  
626 surgical site. Therefore, we only need to clean the window surface by flushing saline and remove  
627 loose tissue debris from the surface. With the growth of granulation tissue accompanied by  
628 angiogenesis and fibroplasia, the tissues on the surface of the surgical site should be peeled off to

629 expose the ligamentum flavum, which can be easily distinguished from the newly generated tissues  
630 by its tough collagenous structures. In addition, the laminae and processes of two vertebrae around  
631 the window should always be scraped clean without tissue adhesions. The procedures for imaging  
632 and post-imaging preparations are the same as previously described.

633 *Dorsal column crush.* The spinal cord dorsal column crush was conducted following  
634 previous protocols<sup>62,87</sup> with slight modifications. Briefly, T12 laminectomy was performed to  
635 expose the spinal cord using Dumont #2 Laminectomy forceps. Two small holes were made in the  
636 dura with a 30-gauge needle symmetrically around 0.5 mm lateral to the midline. A dorsal hemi-  
637 crush injury was made by inserting the modified Dumont #5 forcep through the two small holes  
638 approximately 0.6 mm into the dorsal spinal cord and squeezing with pressure for 5s, and repeating  
639 three times.

640  
641 **Multimodal NLO microscopy.** The setup of our multimodal NLO microscope is shown in  
642 **Supplementary Fig. 1.** An integrated optical parametric oscillator (OPO, picoEmerald S, APE)  
643 was used as the light source for SRS imaging. It consists of a Stokes beam (1031nm) and pump  
644 beam (tunable from 780nm to 960nm) with 2 ps pulse duration and 80 MHz repetition rate. The  
645 intensity of the Stokes beam was modulated at 20 MHz by a built-in electro optical modulator.  
646 The pump beam was combined with the Stokes beam using a dichroic mirror (D1) inside the  
647 picoEmerald S. A femtosecond Ti:sapphire laser (Chameleon Ultra II, Coherent) tuned to 920nm  
648 was used as the laser source for exciting two-photon fluorescence and generating second harmonic  
649 generation signals. The fs beam was rotated from horizontal to vertical polarization by a half-wave  
650 plate(SAHWP05M-1700, Thorlabs) and then combined with the ps beam by a polarizing beam  
651 splitter (CCM1-PBS252/M, Thorlabs). The ps beam and fs beam were collimated and magnified  
652 by a pair of achromatic doublets to match the 3 mm Galvo XY-scan mirror (6215H, Cambridge

653 Technology). The Galvo mirror and the rear pupil of the objective lens (XLPLN25XSVMP2,  
654 25×/1.05 NA, Olympus) were conjugated by a telecentric scan lens L5 (SL50-CLS2, Thorlabs)  
655 and an infinity-corrected tube lens L6 (TTL200-S8, Thorlabs). The laser beam was expanded by  
656 the scan and tube lens to fill the back aperture of the objective.

657 For SRS imaging, the backscattered pump beam collected by the objective was reflected  
658 by a polarizing beam splitter (CCM1-PBS252/M, Thorlabs) and directed to a large area  
659 (10mm×10mm) Si photodiode (S3590-08; Hamamatsu). A dichroic short-pass filter D3 (69-206,  
660 short-pass at 700nm, Edmund) was used to separate the SRS detection path from the fluorescence  
661 detection path. A filter set (Fs1) including a short-pass filter (86-108, short-pass at 975nm OD4,  
662 Edmund) and a band-pass filter (FF01-850/310, Semrock) were placed before the photodiode to  
663 completely block the Stokes beam. The output of the photodiode was then fed into a lock-in  
664 amplifier (LIA) for signal demodulation and amplification to obtain highly sensitive detection of  
665 stimulated Raman loss (SRL).

666 For two-photon imaging, the polarizing beam splitter above the objective was replaced by  
667 a dichroic beam splitter D2 (FF665-Di02, Semrock) to reflect the TPEF and SHG signal to the  
668 photodetection unit. An interchangeable dichroic beam splitter D4 (FF488-Di01-25×36 or FF518-  
669 Di01-25×36, Semrock) was placed after D3 to separate the fluorescence into two current  
670 photomultiplier (PMT) modules (H11461-03 and H11461-01, Hamamatsu). Two filter sets Fs2  
671 (FF01-715/SP-25, Semrock; FF01-525/50, Semrock or HQ620/60X, Chroma) and Fs3 (FF01-  
672 720/SP-25, Semrock; FF01-525/50, Semrock or HQ440/80M, Chroma) were placed before the  
673 PMTs to reject the excitation beam and transmit fluorescence. The output currents of the two PMTs  
674 were then converted to voltage by two current amplifiers (SR570, Stanford research). The outputs  
675 of the two current amplifiers and LIA were then fed into a multifunction acquisition card (PCIe-

676 6363, National Instrument) to reconstruct the image. For spectral characterization of emitted TPEF,  
677 the dichroic mirror D4 was switched to 665dcxr (Chroma) to reflect fluorescence onto a fiber-  
678 based spectroscopic detection module. The reflected fluorescence was filtered by a short pass filter  
679 (SP01-633RU-25, Semrock) and coupled into a fiber bundle before being directed to a  
680 multispectral detection system consisting of a spectrograph (455 ~ 650 nm) equipped with a 16-  
681 channel PMT module (PML-16-C-0, Becker & Hickl). This detection system allows spectral  
682 measurements for each pixel of the TPEF image with a 13-nm spectral resolution. All the hardware  
683 was controlled by a custom-written C# program to acquire two-photon and SRS images.

684         The hyperspectral SRS sweeping mode was used to acquire the SRS spectra of solutions  
685 and tissues in the fingerprint and C-H stretch region. First, temporal overlapping calibration of the  
686 pump and Stokes beams at the fingerprint and C-H vibration regions was performed by adjusting  
687 a built-in delay stage based on the SRS signal of 6  $\mu\text{m}$  polystyrene beads (Polysciences, Inc.,  
688 Warrington, PA), Olive oil and heavy water (99% pure, D2O) at their specific Raman peaks. Since  
689 solution samples are homogenous with little scattering, to achieve SRS imaging of solutions in an  
690 epi-detection configuration, a piece of folded tissue paper was stuck to the bottom of the slide to  
691 backscatter the SRS signals. The wavelength of the pump beam was sequentially tuned with 0.3-  
692 nm steps by the program through a serial communication port. For Iodixanol SRS imaging, the  
693 Lyot filter inside the laser was adjusted to fast tune the pump wavelength from 891.1 nm (1523  
694  $\text{cm}^{-1}$ , on-resonant) to 893 nm (1500  $\text{cm}^{-1}$ , off-resonant). By synchronizing the Lyot filter to the  
695 frame trigger, a pair of “on-resonant” and “off-resonant” images could be acquired with less than  
696 3 s switching time. The final Iodixanol image was obtained by subtracting the off-resonant signals  
697 from the on-resonant signals.

698

699 ***In vivo* imaging.** Before each imaging session, the mouse received a retro-orbital intravenous  
700 injection of 100  $\mu$ l Texas Red dextran (70 kDa, 1mg/100ul in saline, Invitrogen) to label blood  
701 vessels when necessary. The stabilization stage securing the mouse was placed on a five-axis stage  
702 beneath our customized microscope. The five-axis stage allows three-axis translation and  
703  $\pm 5^\circ$  pitch and roll flexure motion. To reduce the motion artifacts caused by breathing, the mouse's  
704 head was secured by two head bars and the mouse's body was elevated a little by lowering the  
705 holding plate to allow room for chest movement during breathing (**Supplementary Fig. 4a**). The  
706 mouse's spinal cord was aligned perpendicular to the objective axis by adjusting the roll and pitch  
707 angles of the stage guided by the bright-field image (4 $\times$  objective, 0.16 NA, Olympus). Since the  
708 spinal cord has a natural curvature, in order to align the sample surface precisely during NLO  
709 imaging over a large FOV, the angle needs to be finely adjusted for each small sub-region guided  
710 by the TPEF signal of each FOV. The femtosecond laser was tuned to 920 nm for TPEF excitation  
711 of GFP, YFP or Texas Red. First, a 10 $\times$  objective lens (NA = 0.45, Nikon) was used to obtain an  
712 image of the entire intervertebral window as a roadmap for navigating between imaging sessions.  
713 Then a 25 $\times$  water immersion objective (NA = 1.05, Olympus) was used for high-resolution two-  
714 photon and SRS imaging of the target area. For two-photon imaging with 10 $\times$  and 25 $\times$  objectives,  
715 the post-objective power ranged from 40 to 65 mw and 10 to 50 mw respectively, depending on  
716 the clarity of the intervertebral window. During imaging, the holding plate was heated to 37°C to  
717 keep the mouse warm. Ketamine-xylazine (43.75 mg kg<sup>-1</sup>; 6.25 mg kg<sup>-1</sup>) were supplemented when  
718 necessary.

719

720 **Optical clearing by Iodixanol.** Iodixanol/OptiPrep (D1556, Sigma-Aldrich) was purchased as a  
721 60% w/v stock solution and prepared with various concentrations by diluting the 60% w/v stock

722 solution in sterile phosphate buffered saline (PBS). To achieve optical clearing of the IWLFL,  
723 Iodixanol was applied and supplemented hourly. Imaging was usually started 10 min after every  
724 Iodixanol administration when the optical clearing effect reached a plateau.

725

726 **Histology.** Mice were deeply anesthetized and then perfused transcardially with 20 ml PBS to  
727 wash out the blood and 20 ml 4% (w/v) PFA (Sigma-Aldrich) for fixation. Spinal cord segments  
728 (~1 cm) at the surgical and control region were dissected out and immersed in 15% (w/v) sucrose  
729 PBS solution for 12 hrs before further dehydration in 30% sucrose PBS solution. After  
730 sedimentation, samples were frozen at -80°C and then cut to 50  $\mu$ m-thick sagittal sections on a  
731 CryoStar NX70 Cryostat (Thermo Scientific). The GFP-labeled microglia cells located less than  
732 50  $\mu$ m below the dorsal surface were imaged for morphological analysis.

733

734 **Laser axotomy.** Laser axotomy is achieved by a highly localized nonlinear process based on  
735 multi-photon ionization and plasma-mediated ablation<sup>88</sup>. To perform imaging-guided laser  
736 axotomy, a femtosecond laser tuned to 920 nm was focused on the targeted axon for 1-4 s with an  
737 average power of 250 mW. The lesion caused by laser ablation can be visualized and quantified  
738 by the newly generated fluorescence<sup>88,89</sup> or SRS signal of the spinal cord.

739

740 **Image processing and analysis.**

741 Since *in vivo* spinal cord imaging would be affected severely by motion artifacts caused by  
742 breathing and heartbeats, it is necessary to perform image registration to acquire stable images.  
743 For multimodal NLO imaging, three-dimensional (3D) optical sectioning was performed to obtain  
744 images at different depths. To reduce intra-frame distortion, 10 frames (512×512 pixels) were  
745 acquired per slice with a 2-Hz frame rate. Single-channel 3D image registration was carried out as

746 follows. First, image registration was performed on the sequential frames for each slice using the  
747 ‘StackReg’ plugin<sup>90</sup> in Fiji software<sup>91</sup>. Then the registered frames were averaged to form a target  
748 image used for the next step of registration. Using the ‘bUnwarpJ’ plugin<sup>92</sup> in Fiji, each raw image  
749 frame was then registered individually to the target image. The registered frames were then  
750 averaged to obtain the final slice for each depth with minimal motion artifacts and improved signal-  
751 to-background ratio. Registration between slices was then performed using the ‘StackReg’ plugin  
752 to construct the 3D image stack. For two-channel 3D image registration, since each pair of the  
753 two-channel images was acquired simultaneously with the same deformation, they should be  
754 registered using the same transformation parameters. During ‘bUnwarpJ’ registration, the  
755 transformation information for each frame of the single-channel images was recorded and then  
756 applied to the corresponding frames of another channel. To co-localize SRS image and fs laser  
757 excited TPEF image, we captured the ps laser excited TPEF images simultaneously with the SRS  
758 image, which were then used as reference images for SRS and fs TPEF image registration. The  
759 ‘MultiStackReg’ plugin in Fiji was used for multichannel stack registration using the same  
760 transformation parameters. All these registration procedures were implemented in the Fiji macro  
761 programming language. To acquire the large-FOV images of the intervertebral window as shown  
762 in **Fig.1c, Fig. 4a, Supplementary Fig. 4a, Supplementary Fig. 15a, Supplementary Fig. 16**  
763 and **Supplementary Fig. 17**, the sub-images were stitched using the ‘Pairwise stitching’ plugin<sup>93</sup>  
764 in Fiji.

765 To characterize the image contrast, fluorescence images were stacked as a maximum z  
766 projection. In each FOV, microglia with visible cell bodies were randomly selected for contrast  
767 characterization. An intensity profile was plotted through the center of the microglia cell body.  
768 The peak value of the profile is represented as  $I_0$ . The background value B is defined as the



769 averaged intensity value over a region at 10  $\mu\text{m}$  away from the intensity peak<sup>94</sup>. The image contrast  
770 can be calculated as<sup>16</sup>:

$$771 \quad \frac{I_0 - B}{I_0 + B}$$

772 A contrast value of 0 represents no contrast while 1 represents noiseless contrast.

773 For quantification of microglia ramification index and process endpoints, microglia with  
774 intact and clear morphology (contrast  $\geq 0.97$ ) (**Supplementary Fig 13**) in each FOV were  
775 randomly selected for morphological quantification without bias. The microglial ramification  
776 index and process endpoints were quantified based on the published methods<sup>32,33</sup> with small  
777 modifications. Briefly, binary images of individual microglia were first acquired and saved as  
778 independent files as previously described<sup>32</sup>. Microglial binary images were skeletonized using the  
779 ‘bwskel’ MATLAB function and the endpoints of each microglial skeleton were counted using the  
780 ‘bwmorph’ MATLAB function. To quantify the ramification index, the MATLAB functions  
781 ‘bwarea’ and ‘bwperim’ (8-connected neighborhood) were used to acquire the area and perimeter  
782 value of each cell. The ramification index is then calculated as<sup>32</sup>:

$$783 \quad (\text{perimeter/area})/[2 \cdot (\pi/\text{area})^{1/2}]$$

784 For analysis of microglia aggregation and axonal degeneration, a dot rectangular region of  
785 interest was outlined along the axonal degeneration path to quantify the spatial distribution of the  
786 microglial aggregation after laser axotomy (**Fig. 4a**). The maximal z projection images of axon  
787 and microglia in the rectangle area were smoothed and converted to a bit-map. The aggregation  
788 size of the microglia was calculated as the sum of the GFP fluorescence signals in the bit-mapped  
789 area normalized by the fluorescence intensity of surrounding uninjured axons. The axonal diameter  
790 was measured based on the YFP fluorescence signals along the degeneration path.

791 For microglia-nodes of Ranvier contact analysis, the positions of the nodes of Ranvier on  
792 the axon were first confirmed by merging the myelin SRS image and axon TPEF image. Axon  
793 images were then merged with microglia images to visualize microglia contacts with the nodes of  
794 Ranvier. To reduce noise, images were smoothed after background subtraction. Contacts were  
795 defined as the 3D colocalization of the fluorescence of microglia and the node of Ranvier.  
796 Wrapping contact was identified when the nodes of Ranvier were totally enveloped by microglia  
797 processes.

798

799 **Statistical analysis.** Statistical analysis and data visualization were performed using GraphPad  
800 Prism 7 software. All the data are presented as mean  $\pm$  s.e.m. and  $\alpha = 0.05$  for all analyses. P  
801 values for ordinary one-way ANOVA with Dunnett's multiple comparison test (for normally  
802 distributed data) or Kruskal-Wallis test (for non-normally distributed data) are given on the figures.  
803 Data normality was checked using Shapiro-Wilk normality test. No statistical methods were used  
804 to predetermine sample sizes, but our sample sizes were similar to reported studies of chronic  
805 spinal cord imaging<sup>16,17</sup>.

806

807

808 **Acknowledgments.** This work was supported by the Hong Kong Research Grants Council through  
809 grants 16103215, 16148816, 16102518, 16102920, T13-607/12R, T13-706/11-1, T13-605/18W,  
810 C6002-17GF, C6001-19E, N\_HKUST603/19 and the Innovation and Technology Commission  
811 (ITCPD/17-9), and the Area of Excellence Scheme of the University Grants Committee (AoE/M-  
812 604/16, AOE/M-09/12) and the Hong Kong University of Science & Technology (HKUST)  
813 through grant RPC10EG33.

814

815 **Author contributions.** W.W, S.H., and J.Y.Q conceived the research idea and designed the  
816 experiments; X.L. and W.W. built the imaging systems; W.W performed animal surgery and  
817 imaging experiments; J.W. perfused the animal and prepared slices for histology analysis; W.W  
818 analyzed the data with the help of C.C; S.H. and W.W. wrote the paper with input from all other  
819 authors.

820

821 **Competing interests.** All authors declare that they have no competing interests.

822

823 **REFERENCE**

824

825 1. Kobat, D. *et al.* Deep tissue multiphoton microscopy using longer wavelength excitation. *Opt. Express*,  
826 *OE* **17**, 13354–13364 (2009).

827 2. Xu, H.-T., Pan, F., Yang, G. & Gan, W.-B. Choice of cranial window type for in vivo imaging affects  
828 dendritic spine turnover in the cortex. *Nature Neuroscience* **10**, 549–551 (2007).

829 3. Sohler, T. P., Lothrop, G. N. & Forbes, H. S. The Pial Circulation of Normal, Non-Anesthetized Animals  
830 Part ii. the Effects of Drugs, Alcohol and Co<sub>2</sub>. *J Pharmacol Exp Ther* **71**, 331–335 (1941).

831 4. Drew, P. J. *et al.* Chronic optical access through a polished and reinforced thinned skull. *Nature*  
832 *Methods* **7**, 981–984 (2010).

833 5. Yang, G., Pan, F., Parkhurst, C. N., Grutzendler, J. & Gan, W.-B. Thinned-skull cranial window  
834 technique for long-term imaging of the cortex in live mice. *Nat Protoc* **5**, 201–208 (2010).

835 6. Grutzendler, J., Kasthuri, N. & Gan, W.-B. Long-term dendritic spine stability in the adult cortex.  
836 *Nature* **420**, 812–816 (2002).

837 7. Li, Y., Du, X. & Du, J. Resting microglia respond to and regulate neuronal activity in vivo.  
838 *Communicative & Integrative Biology* **6**, e24493 (2013).

839 8. Hamm, J. P., Peterka, D. S., Gogos, J. A. & Yuste, R. Altered Cortical Ensembles in Mouse Models of  
840 Schizophrenia. *Neuron* **94**, 153-167.e8 (2017).

841 9. Xu, Z. *et al.* Rescue of maternal immune activation-induced behavioral abnormalities in adult mouse  
842 offspring by pathogen-activated maternal T reg cells. *Nature Neuroscience* 1–13 (2021)  
843 doi:10.1038/s41593-021-00837-1.

844 10. Misgeld, T., Nikic, I. & Kerschensteiner, M. In vivo imaging of single axons in the mouse spinal  
845 cord. *Nat Protoc* **2**, 263–268 (2007).

846 11. Davalos, D. *et al.* Stable in vivo imaging of densely populated glia, axons and blood vessels in the  
847 mouse spinal cord using two-photon microscopy. *Journal of Neuroscience Methods* **169**, 1–7 (2008).

848 12. Ran, C., Hoon, M. A. & Chen, X. The coding of cutaneous temperature in the spinal cord. *Nature*  
849 *Neuroscience* **19**, 1201–1209 (2016).

850 13. Kerschensteiner, M., Schwab, M. E., Lichtman, J. W. & Misgeld, T. *In vivo* imaging of axonal  
851 degeneration and regeneration in the injured spinal cord. *Nature Medicine* **11**, 572–577 (2005).

- 852 14. Dray, C., Rougon, G. & Debarbieux, F. Quantitative analysis by in vivo imaging of the dynamics of  
853 vascular and axonal networks in injured mouse spinal cord. *Proceedings of the National Academy of*  
854 *Sciences* **106**, 9459–9464 (2009).
- 855 15. Di Maio, A. *et al.* In Vivo Imaging of Dorsal Root Regeneration: Rapid Immobilization and  
856 Presynaptic Differentiation at the CNS/PNS Border. *Journal of Neuroscience* **31**, 4569–4582 (2011).
- 857 16. Farrar, M. J. *et al.* Chronic in vivo imaging in the mouse spinal cord using an implanted chamber.  
858 *Nature Methods* **9**, 297–302 (2012).
- 859 17. Fenrich, K. K. *et al.* Long-term in vivo imaging of normal and pathological mouse spinal cord with  
860 subcellular resolution using implanted glass windows. *The Journal of Physiology* **590**, 3665–3675  
861 (2012).
- 862 18. Figley, S. A. *et al.* A Spinal Cord Window Chamber Model for In Vivo Longitudinal Multimodal  
863 Optical and Acoustic Imaging in a Murine Model. *PLOS ONE* **8**, e58081 (2013).
- 864 19. Kim, J. V. *et al.* Two-photon laser scanning microscopy imaging of intact spinal cord and cerebral  
865 cortex reveals requirement for CXCR6 and neuroinflammation in immune cell infiltration of cortical  
866 injury sites. *Journal of Immunological Methods* **352**, 89–100 (2010).
- 867 20. Nadrigny, F., Le Meur, K., Schomburg, E. D., Safavi-Abbasi, S. & Dibaj, P. Two-Photon Laser-  
868 Scanning Microscopy for Single and Repetitive Imaging of Dorsal and Lateral Spinal White Matter In  
869 Vivo. *Physiol Res* 531–537 (2017) doi:10.33549/physiolres.933461.
- 870 21. Nimmerjahn, A., Kirchhoff, F. & Helmchen, F. Resting Microglial Cells Are Highly Dynamic  
871 Surveillants of Brain Parenchyma in Vivo. *Science* **308**, 1314–1318 (2005).
- 872 22. Davalos, D. *et al.* ATP mediates rapid microglial response to local brain injury in vivo. *Nature*  
873 *Neuroscience* **8**, 752–758 (2005).
- 874 23. Dibaj, P. *et al.* NO mediates microglial response to acute spinal cord injury under ATP control in  
875 vivo. *Glia* **58**, 1133–1144 (2010).
- 876 24. Stollg, G. & Jander, S. The role of microglia and macrophages in the pathophysiology of the CNS.  
877 *Progress in Neurobiology* **58**, 233–247 (1999).
- 878 25. Perry, V. H., Nicoll, J. A. R. & Holmes, C. Microglia in neurodegenerative disease. *Nat Rev Neurol*  
879 **6**, 193–201 (2010).
- 880 26. Kreutzberg, G. W. Microglia: a sensor for pathological events in the CNS. *Trends in Neurosciences*  
881 **19**, 312–318 (1996).

- 882 27. Stence, N., Waite, M. & Dailey, M. E. Dynamics of microglial activation: A confocal time-lapse  
883 analysis in hippocampal slices. *Glia* **33**, 256–266 (2001).
- 884 28. Davis, E. J., Foster, T. D. & Thomas, W. E. Cellular forms and functions of brain microglia. *Brain*  
885 *Research Bulletin* **34**, 73–78 (1994).
- 886 29. Karperien, A., Ahammer, H. & Jelinek, H. Quantitating the subtleties of microglial morphology  
887 with fractal analysis. *Front. Cell. Neurosci.* **7**, (2013).
- 888 30. Fernández-Arjona, M. del M., Grondona, J. M., Fernández-Llebrez, P. & López-Ávalos, M. D.  
889 Microglial Morphometric Parameters Correlate With the Expression Level of IL-1 $\beta$ , and Allow  
890 Identifying Different Activated Morphotypes. *Front. Cell. Neurosci.* **13**, (2019).
- 891 31. Gomez-Nicola, D. & Perry, V. H. Microglial Dynamics and Role in the Healthy and Diseased Brain:  
892 A Paradigm of Functional Plasticity. *Neuroscientist* **21**, 169–184 (2015).
- 893 32. Madry, C. *et al.* Microglial Ramification, Surveillance, and Interleukin-1 $\beta$  Release Are Regulated  
894 by the Two-Pore Domain K<sup>+</sup> Channel THIK-1. *Neuron* **97**, 299-312.e6 (2018).
- 895 33. Morrison, H. W. & Filosa, J. A. A quantitative spatiotemporal analysis of microglia morphology  
896 during ischemic stroke and reperfusion. *J Neuroinflammation* **10**, 4 (2013).
- 897 34. Stowell, R. D. *et al.* Noradrenergic signaling in the wakeful state inhibits microglial surveillance  
898 and synaptic plasticity in the mouse visual cortex. *Nature Neuroscience* **22**, 1782–1792 (2019).
- 899 35. Liu, Y. U. *et al.* Neuronal network activity controls microglial process surveillance in awake mice  
900 via norepinephrine signaling. *Nat Neurosci* **22**, 1771–1781 (2019).
- 901 36. Sun, W. *et al.* In vivo Two-Photon Imaging of Anesthesia-Specific Alterations in Microglial  
902 Surveillance and Photodamage-Directed Motility in Mouse Cortex. *Front. Neurosci.* **13**, (2019).
- 903 37. Soltys, Z., Ziaja, M., Pawliński, R., Setkowicz, Z. & Janeczko, K. Morphology of reactive microglia  
904 in the injured cerebral cortex. Fractal analysis and complementary quantitative methods. *Journal of*  
905 *Neuroscience Research* **63**, 90–97 (2001).
- 906 38. Zanier, E. R., Fumagalli, S., Perego, C., Pischiutta, F. & De Simoni, M.-G. Shape descriptors of the  
907 “never resting” microglia in three different acute brain injury models in mice. *Intensive Care Med Exp*  
908 **3**, (2015).
- 909 39. Soltys, Z. *et al.* Quantitative morphological study of microglial cells in the ischemic rat brain  
910 using principal component analysis. *Journal of Neuroscience Methods* **146**, 50–60 (2005).

- 911 40. Sousa, A. A. de *et al.* Three-dimensional morphometric analysis of microglial changes in a mouse  
912 model of virus encephalitis: age and environmental influences. *European Journal of Neuroscience* **42**,  
913 2036–2050 (2015).
- 914 41. Riester, K. *et al.* In vivo characterization of functional states of cortical microglia during  
915 peripheral inflammation. *Brain, Behavior, and Immunity* (2019) doi:10.1016/j.bbi.2019.12.007.
- 916 42. Norden, D. M., Trojanowski, P. J., Villanueva, E., Navarro, E. & Godbout, J. P. Sequential  
917 activation of microglia and astrocyte cytokine expression precedes increased iba-1 or GFAP  
918 immunoreactivity following systemic immune challenge. *Glia* **64**, 300–316 (2016).
- 919 43. Kozlowski, C. & Weimer, R. M. An Automated Method to Quantify Microglia Morphology and  
920 Application to Monitor Activation State Longitudinally In Vivo. *PLoS One* **7**, (2012).
- 921 44. Staikopoulos, V. *et al.* Graded peripheral nerve injury creates mechanical allodynia proportional  
922 to the progression and severity of microglial activity within the spinal cord of male mice. *Brain,*  
923 *Behavior, and Immunity* S0889159120323941 (2020) doi:10.1016/j.bbi.2020.11.018.
- 924 45. Hamilton, N. *et al.* The failure of microglia to digest developmental apoptotic cells contributes to  
925 the pathology of RNASET2-deficient leukoencephalopathy. *Glia* **68**, 1531–1545 (2020).
- 926 46. Neubrand, V. E., Forte-Lago, I., Caro, M. & Delgado, M. The atypical RhoGTPase RhoE/Rnd3 is a  
927 key molecule to acquire a neuroprotective phenotype in microglia. *Journal of Neuroinflammation* **15**,  
928 343 (2018).
- 929 47. Heindl, S. *et al.* Automated Morphological Analysis of Microglia After Stroke. *Front. Cell.*  
930 *Neurosci.* **12**, (2018).
- 931 48. Lafrenaye, A. D., Todani, M., Walker, S. A. & Povlishock, J. T. Microglia processes associate with  
932 diffusely injured axons following mild traumatic brain injury in the micro pig. *Journal of*  
933 *Neuroinflammation* **12**, 186 (2015).
- 934 49. Takatsuru, Y., Nabekura, J., Ishikawa, T., Kohsaka, S. & Koibuchi, N. Early-life stress increases the  
935 motility of microglia in adulthood. *J Physiol Sci* **65**, 187–194 (2015).
- 936 50. Morrison, H., Young, K., Qureshi, M., Rowe, R. K. & Lifshitz, J. Quantitative microglia analyses  
937 reveal diverse morphologic responses in the rat cortex after diffuse brain injury. *Sci Rep* **7**, 13211  
938 (2017).
- 939 51. Olszewski, A. D., Yaszemski, M. J. & White, A. A. I. The Anatomy of the Human Lumbar  
940 Ligamentum Flavum: New Observations and Their Surgical Importance. *Spine* **21**, 2307–2312 (1996).
- 941 52. Saito, T. *et al.* Experimental Mouse Model of Lumbar Ligamentum Flavum Hypertrophy. *PLOS*  
942 *ONE* **12**, e0169717 (2017).

- 943 53. Kreisel, D. *et al.* In vivo two-photon imaging reveals monocyte-dependent neutrophil  
944 extravasation during pulmonary inflammation. *Proceedings of the National Academy of Sciences* **107**,  
945 18073–18078 (2010).
- 946 54. Boothe, T. *et al.* A tunable refractive index matching medium for live imaging cells, tissues and  
947 model organisms. *Elife* **6**, (2017).
- 948 55. Priebe, H. *et al.* Synthesis and Characterization of Iodixanol. *Acta Radiol* **36**, 21–31 (1995).
- 949 56. Li, X. *et al.* Quantitative Imaging of Lipid Synthesis and Lipolysis Dynamics in *Caenorhabditis*  
950 *elegans* by Stimulated Raman Scattering Microscopy. *Analytical Chemistry* **91**, 2279–2287 (2019).
- 951 57. Li, X., Jiang, M., Lam, J. W. Y., Tang, B. Z. & Qu, J. Y. Mitochondrial Imaging with Combined  
952 Fluorescence and Stimulated Raman Scattering Microscopy Using a Probe of the Aggregation-Induced  
953 Emission Characteristic. *J. Am. Chem. Soc.* **139**, 17022–17030 (2017).
- 954 58. Albrechtsson, U., Lärusdóttir, H., Norgren, L. & Lundby, B. Iodixanol — a New Nonionic Dimer —  
955 in Aortofemoral Angiography. *Acta Radiologica* **33**, 611–613 (1992).
- 956 59. Heglund, I. F., Michelet, Å. A., Blazak, W. F., Furuhashi, K. & Holtz, E. Preclinical  
957 Pharmacokinetics and General Toxicology of Iodixanol. *Acta Radiol* **36**, 69–82 (1995).
- 958 60. Ford, T., Graham, J. & Rickwood, D. Iodixanol: A Nonionic Iso-osmotic Centrifugation Medium for  
959 the Formation of Self-Generated Gradients. *Analytical Biochemistry* **220**, 360–366 (1994).
- 960 61. Chen, C. *et al.* High-resolution two-photon transcranial imaging of brain using direct wavefront  
961 sensing. *Photon. Res.* **9**, 1144 (2021).
- 962 62. Evans, T. A. *et al.* High-resolution intravital imaging reveals that blood-derived macrophages but  
963 not resident microglia facilitate secondary axonal dieback in traumatic spinal cord injury.  
964 *Experimental Neurology* **254**, 109–120 (2014).
- 965 63. Horn, K. P., Busch, S. A., Hawthorne, A. L., van Rooijen, N. & Silver, J. Another barrier to  
966 regeneration in the CNS: Activated macrophages induce extensive retraction of dystrophic axons  
967 through direct physical interactions. *J Neurosci* **28**, 9330–9341 (2008).
- 968 64. Wang, X. *et al.* Macrophages in spinal cord injury: Phenotypic and functional change from  
969 exposure to myelin debris. *Glia* **63**, 635–651 (2015).
- 970 65. Greenhalgh, A. D. & David, S. Differences in the Phagocytic Response of Microglia and Peripheral  
971 Macrophages after Spinal Cord Injury and Its Effects on Cell Death. *J. Neurosci.* **34**, 6316–6322 (2014).
- 972 66. Busch, S. A., Horn, K. P., Silver, D. J. & Silver, J. Overcoming Macrophage-Mediated Axonal  
973 Dieback Following CNS Injury. *J. Neurosci.* **29**, 9967–9976 (2009).



- 974 67. Landon, D. N. & Williams, P. L. Ultrastructure of the Node of Ranvier. *Nature* **199**, 575–577  
975 (1963).
- 976 68. Lubetzki, C., Sol-Foulon, N. & Desmazières, A. Nodes of Ranvier during development and repair  
977 in the CNS. *Nat Rev Neurol* **16**, 426–439 (2020).
- 978 69. Zhang, J., Yang, X., Zhou, Y., Fox, H. & Xiong, H. Direct contacts of microglia on myelin sheath  
979 and Ranvier’s node in the corpus callosum in rats. *J Biomed Res* **33**, 192–200 (2019).
- 980 70. Eyo, U. B. *et al.* Modulation of Microglial Process Convergence Toward Neuronal Dendrites by  
981 Extracellular Calcium. *J. Neurosci.* **35**, 2417–2422 (2015).
- 982 71. Chattopadhyay, N. *et al.* The Extracellular Calcium-Sensing Receptor Is Expressed in Rat  
983 Microglia and Modulates an Outward K<sup>+</sup> Channel. *Journal of Neurochemistry* **72**, 1915–1922 (1999).
- 984 72. Gründemann, J. & Clark, B. A. Calcium-Activated Potassium Channels at Nodes of Ranvier Secure  
985 Axonal Spike Propagation. *Cell Reports* **12**, 1715–1722 (2015).
- 986 73. Zhang, Z. & David, G. Stimulation-induced Ca<sup>2+</sup> influx at nodes of Ranvier in mouse peripheral  
987 motor axons. *The Journal of Physiology* **594**, 39–57 (2016).
- 988 74. Berdan, R. C., Easaw, J. C. & Wang, R. Alterations in membrane potential after axotomy at  
989 different distances from the soma of an identified neuron and the effect of depolarization on neurite  
990 outgrowth and calcium channel expression. *Journal of Neurophysiology* **69**, 151–164 (1993).
- 991 75. Cserép, C. *et al.* Microglia monitor and protect neuronal function through specialized somatic  
992 purinergic junctions. *Science* **367**, 528–537 (2020).
- 993 76. Cserép, C., Pósfai, B. & Dénes, Á. Shaping Neuronal Fate: Functional Heterogeneity of Direct  
994 Microglia-Neuron Interactions. *Neuron* **109**, 222–240 (2021).
- 995 77. Neumann, H., Kotter, M. R. & Franklin, R. J. M. Debris clearance by microglia: an essential link  
996 between degeneration and regeneration. *Brain* **132**, 288–295 (2009).
- 997 78. Lloyd, A. F. *et al.* Central nervous system regeneration is driven by microglia necroptosis and  
998 repopulation. *Nat Neurosci* **22**, 1046–1052 (2019).
- 999 79. Davalos, D. *et al.* Fibrinogen-induced perivascular microglial clustering is required for the  
1000 development of axonal damage in neuroinflammation. *Nature Communications* **3**, 1–15 (2012).
- 1001 80. Bartholomäus, I. *et al.* Effector T cell interactions with meningeal vascular structures in nascent  
1002 autoimmune CNS lesions. *Nature* **462**, 94–98 (2009).
- 1003 81. Park, K. K. *et al.* Promoting Axon Regeneration in the Adult CNS by Modulation of the  
1004 PTEN/mTOR Pathway. *Science* **322**, 963–966 (2008).

- 1005 82. Chen, G., Zhang, Y.-Q., Qadri, Y. J., Serhan, C. N. & Ji, R.-R. Microglia in Pain: Detrimental and  
1006 Protective Roles in Pathogenesis and Resolution of Pain. *Neuron* **100**, 1292–1311 (2018).
- 1007 83. Petersen, M. A. & Dailey, M. E. Diverse microglial motility behaviors during clearance of dead  
1008 cells in hippocampal slices. *Glia* **46**, 195–206 (2004).
- 1009 84. Kawabori, M. & Yenari, M. A. The role of the microglia in acute CNS injury. *Metab Brain Dis* **30**,  
1010 381–392 (2015).
- 1011 85. Jung, S. *et al.* Analysis of Fractalkine Receptor CX3CR1 Function by Targeted Deletion and Green  
1012 Fluorescent Protein Reporter Gene Insertion. *Molecular and Cellular Biology* **20**, 4106–4114 (2000).
- 1013 86. Feng, G. *et al.* Imaging Neuronal Subsets in Transgenic Mice Expressing Multiple Spectral  
1014 Variants of GFP. *Neuron* **28**, 41–51 (2000).
- 1015 87. Chen, W. *et al.* Rapamycin-Resistant mTOR Activity Is Required for Sensory Axon Regeneration  
1016 Induced by a Conditioning Lesion. *eneuro* **3**, ENEURO.0358-16.2016 (2016).
- 1017 88. Qin, Z. *et al.* New fluorescent compounds produced by femtosecond laser surgery in biological  
1018 tissues: the mechanisms. *Biomed. Opt. Express*, *BOE* **9**, 3373–3390 (2018).
- 1019 89. Sun, Q. *et al.* In vivo imaging-guided microsurgery based on femtosecond laser produced new  
1020 fluorescent compounds in biological tissues. *Biomedical Optics Express* **9**, 581 (2018).
- 1021 90. Thevenaz, P., Ruttimann, U. E. & Unser, M. A pyramid approach to subpixel registration based  
1022 on intensity. *IEEE Transactions on Image Processing* **7**, 27–41 (1998).
- 1023 91. Schindelin, J. *et al.* Fiji: an open-source platform for biological-image analysis. *Nat Methods* **9**,  
1024 676–682 (2012).
- 1025 92. Arganda-Carreras, I. *et al.* Consistent and Elastic Registration of Histological Sections Using  
1026 Vector-Spline Regularization. in *Computer Vision Approaches to Medical Image Analysis* (eds. Beichel,  
1027 R. R. & Sonka, M.) vol. 4241 85–95 (Springer Berlin Heidelberg, 2006).
- 1028 93. Preibisch, S., Saalfeld, S. & Tomancak, P. Globally optimal stitching of tiled 3D microscopic image  
1029 acquisitions. *Bioinformatics* **25**, 1463–1465 (2009).
- 1030 94. Kobat, D., Horton, N. G. & Xu, C. In vivo two-photon microscopy to 1.6-mm depth in mouse  
1031 cortex. *J. Biomed. Opt.* **16**, 106014 (2011).
- 1032
